# Supplementary material for: Iodine-mediated C–N and N–N bond formation: a facile one-pot synthetic approach to 1,2,3-triazoles under metal-free and azide-free conditions
Source: Royal Society of Chemistry journal article supplement (doi:10.1039/c9ra06005g), 2019-01-01
Supplement: c9ra06005g1.pdf [file c9ra06005g1.pdf]

## Supporting Information

### **Iodine-mediated C-N and N-N bond formation: A facile one-pot synthetic approach to 1,2,3-triazoles under metal-free and azide-free conditions**

Geeta Sai Mani,<sup>a</sup> Kavitha Donthiboina,<sup>a</sup> Siddiq Pasha Shaik,<sup>b</sup> Nagula Shankaraiah,<sup>\*a</sup> Ahmed Kamal<sup>\*a,b,c</sup>

#### **List of contents**

|                                                                                |             |
|--------------------------------------------------------------------------------|-------------|
| <sup>1</sup> H and <sup>13</sup> C NMR spectra of compounds <b>4a-ag</b> ..... | <b>2-34</b> |
|--------------------------------------------------------------------------------|-------------|

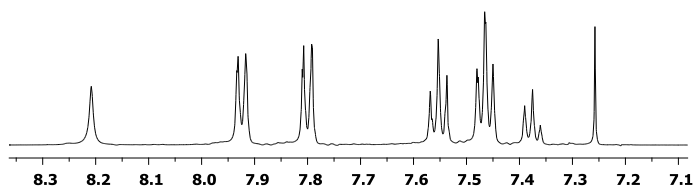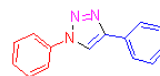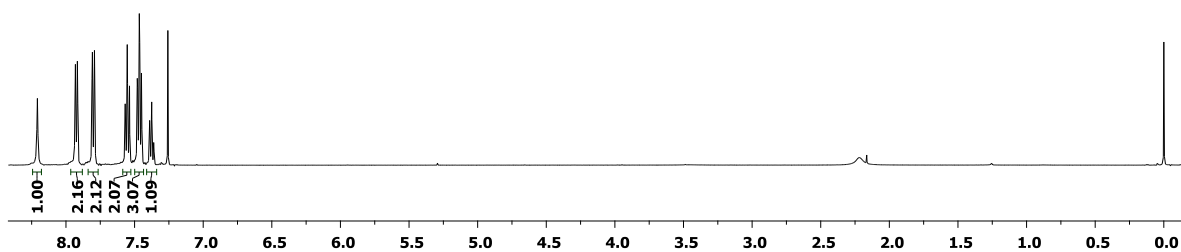

<sup>1</sup>H NMR (500 MHz, CDCl<sub>3</sub>) spectrum of compound 4a

137.09  
130.13  
129.80  
128.94  
128.84  
128.50  
125.92  
120.58  
117.66

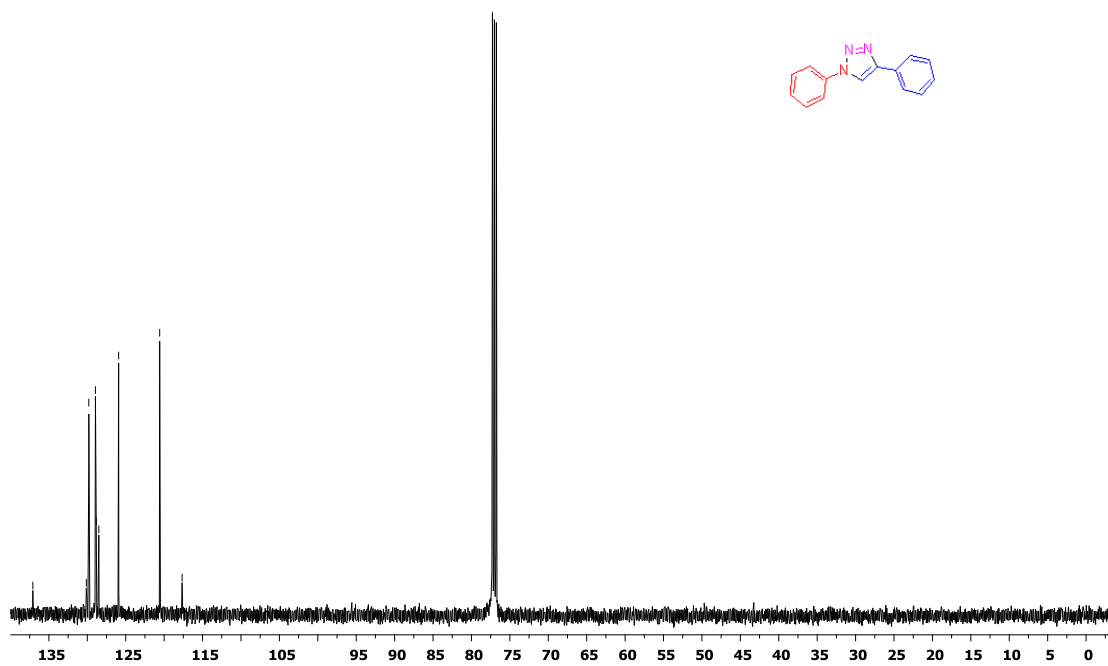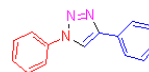

<sup>13</sup>C NMR (125 MHz, CDCl<sub>3</sub>) spectrum of compound 4a

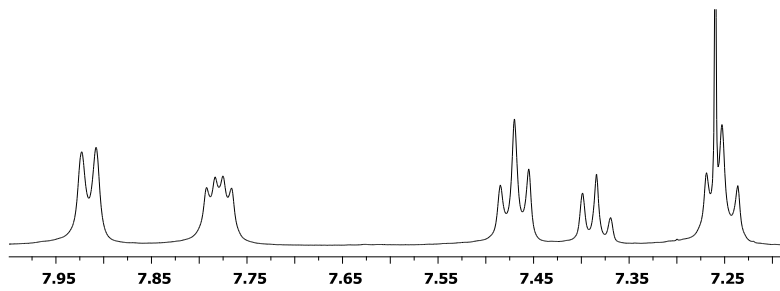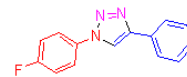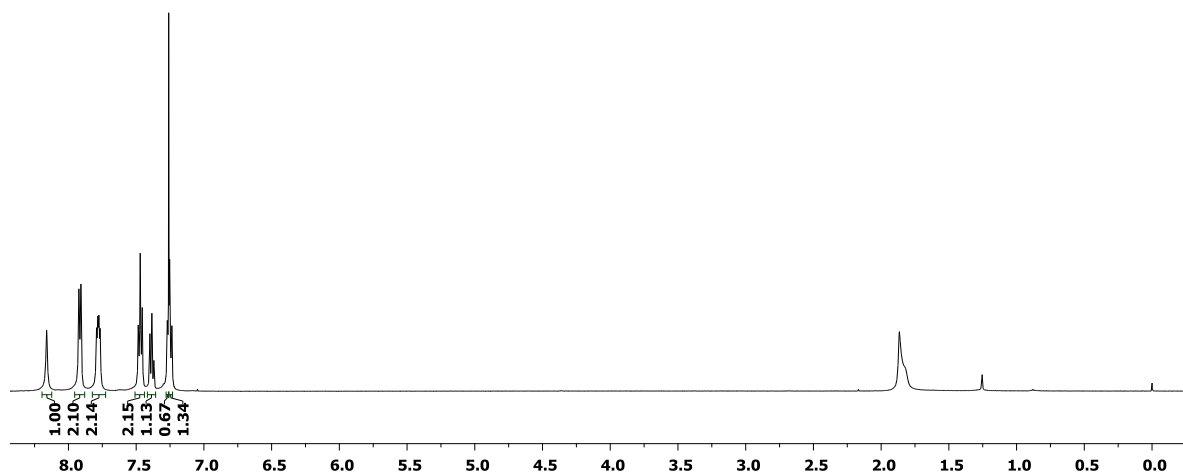

$^1\text{H}$  NMR (500 MHz,  $\text{CDCl}_3$ ) spectrum of compound **4b**

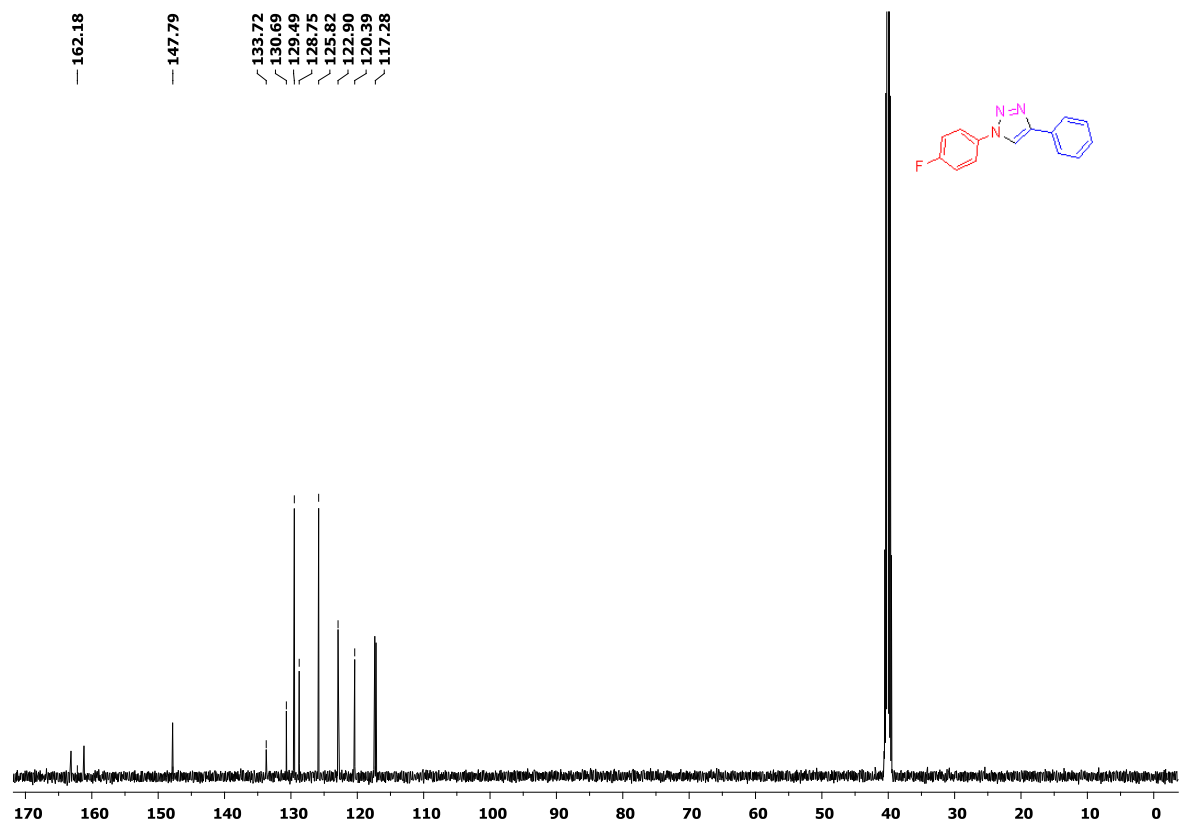

$^{13}\text{C}$  NMR (125 MHz, DMSO) spectrum of compound **4b**

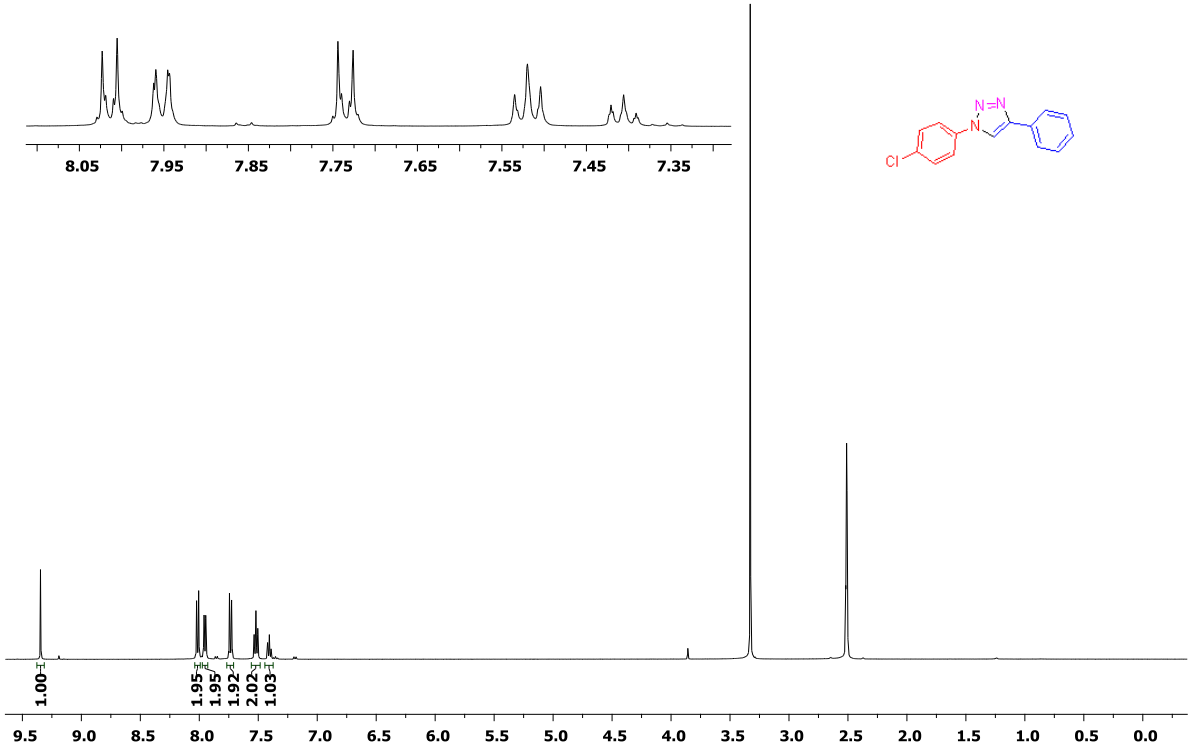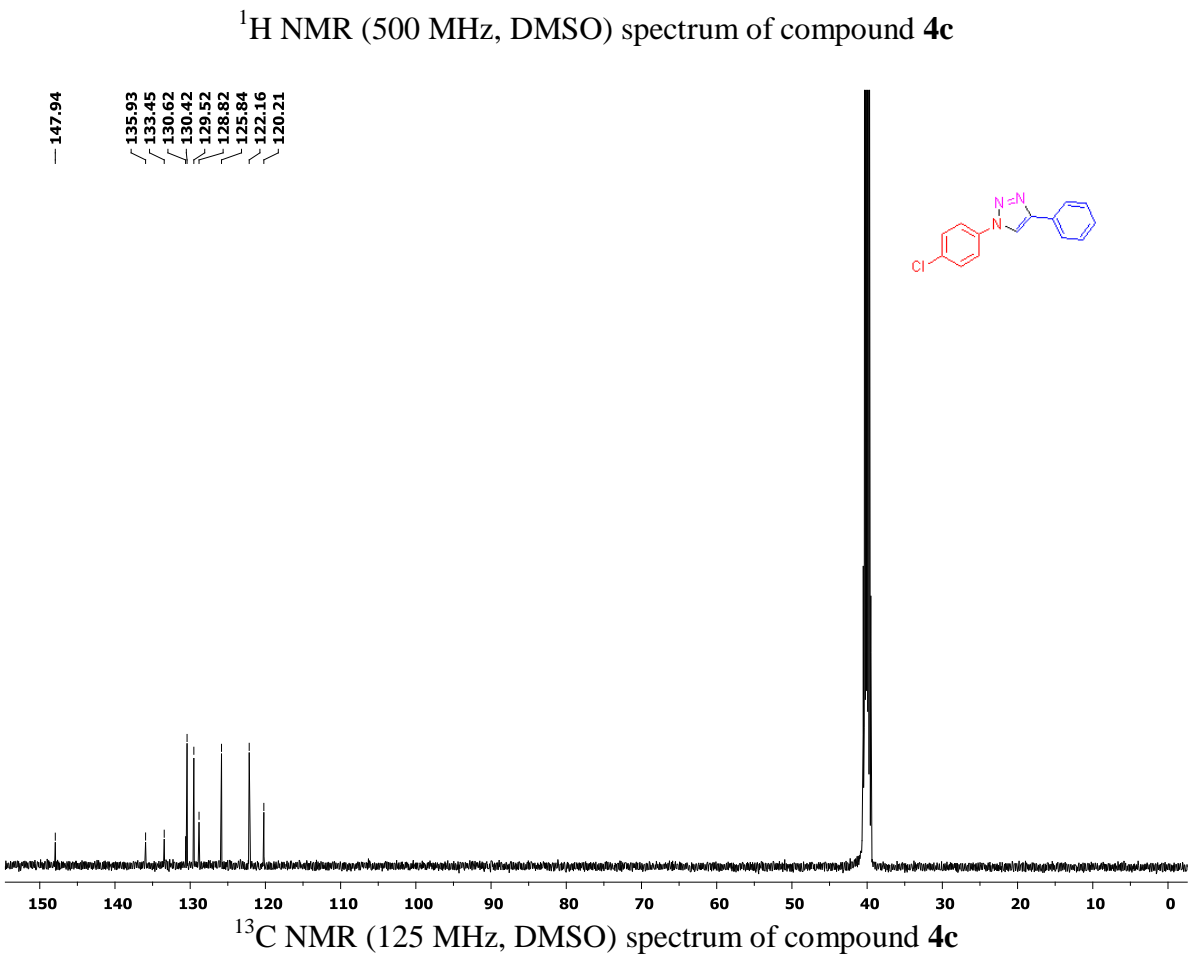

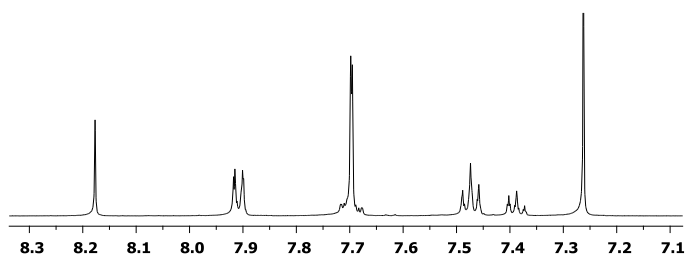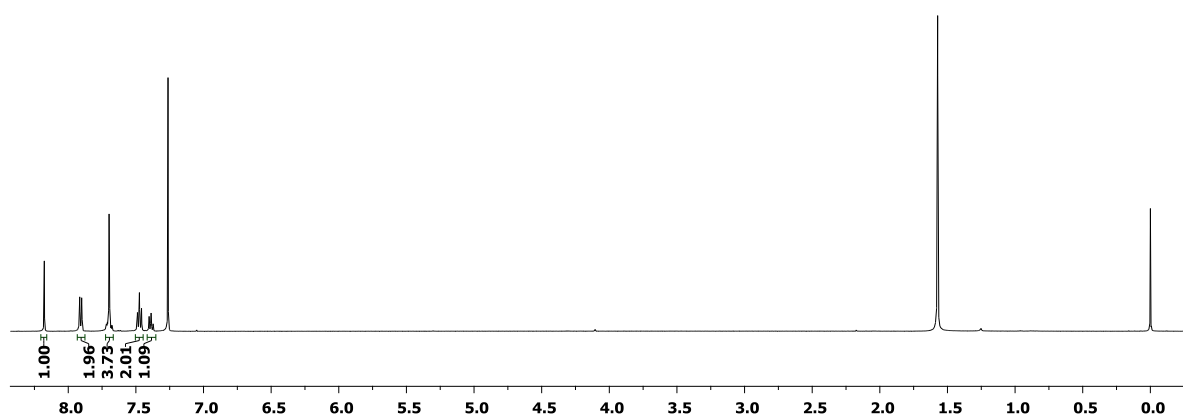

$^1\text{H}$  NMR (500 MHz,  $\text{CDCl}_3$ ) spectrum of compound **4d**

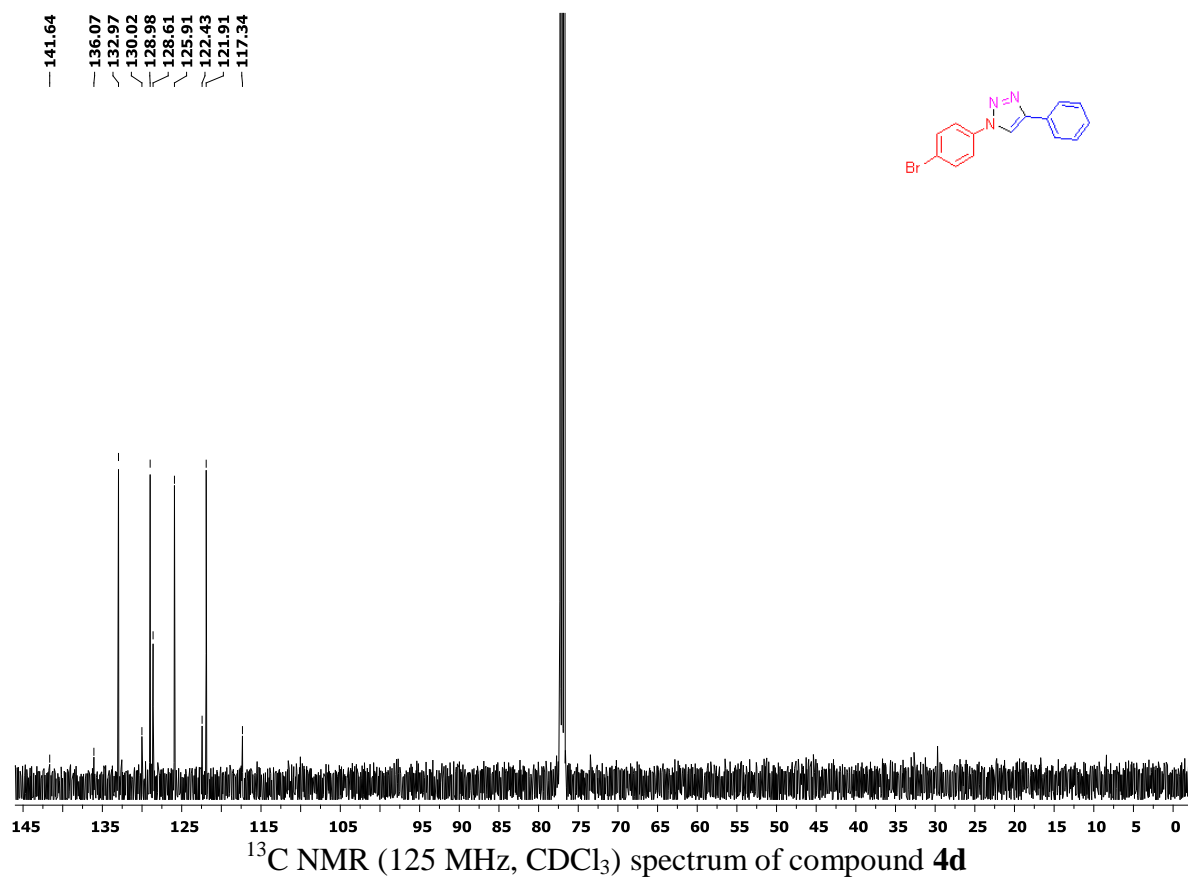

$^{13}\text{C}$  NMR (125 MHz,  $\text{CDCl}_3$ ) spectrum of compound **4d**

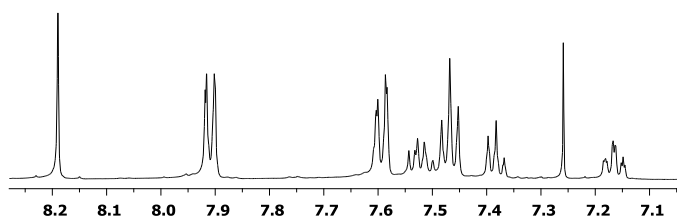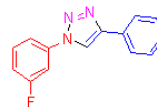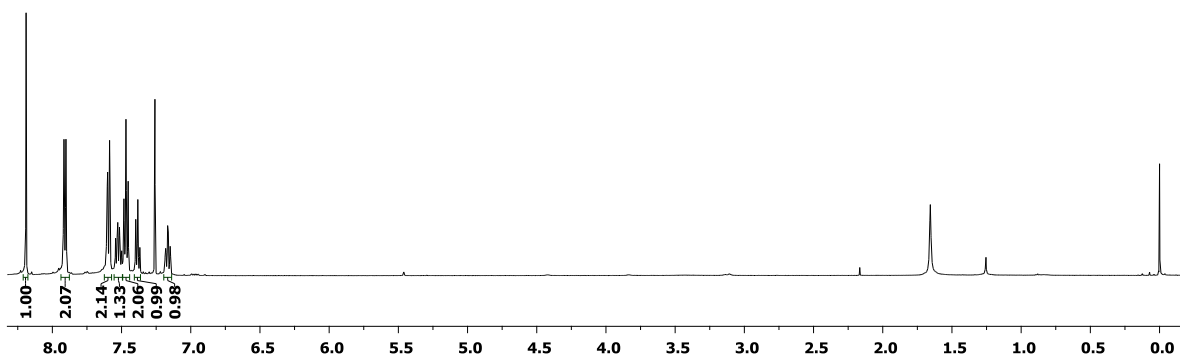

$^1\text{H}$  NMR (500 MHz,  $\text{CDCl}_3$ ) spectrum of compound 4e

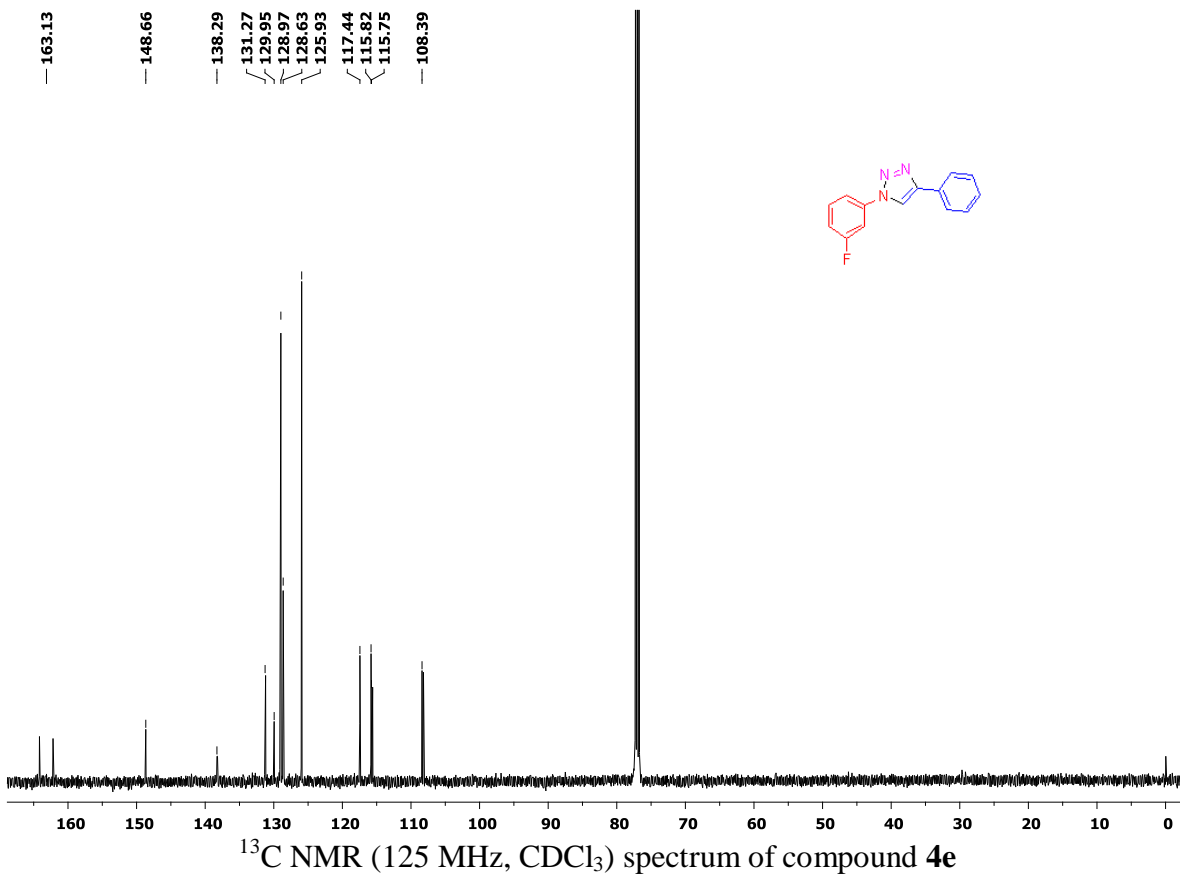

$^{13}\text{C}$  NMR (125 MHz,  $\text{CDCl}_3$ ) spectrum of compound 4e

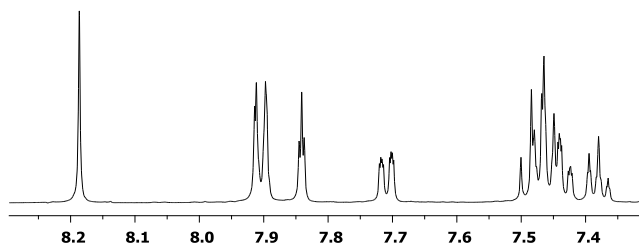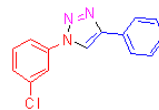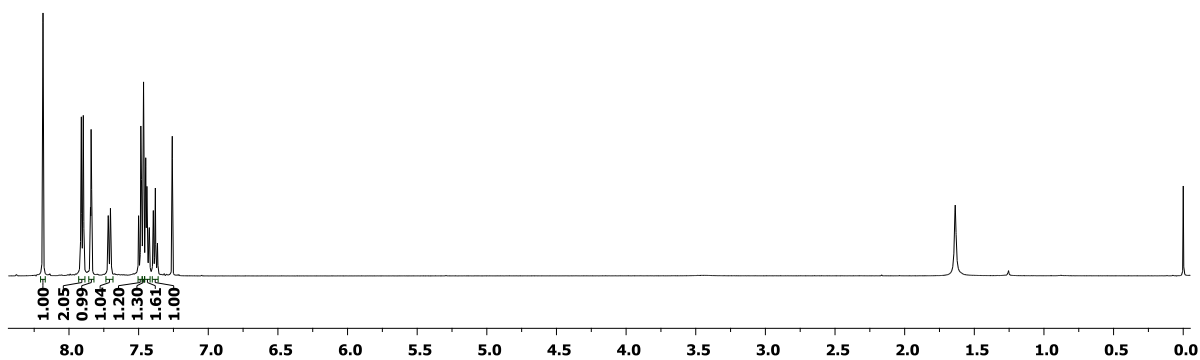

<sup>1</sup>H NMR (500 MHz, CDCl<sub>3</sub>) spectrum of compound 4f

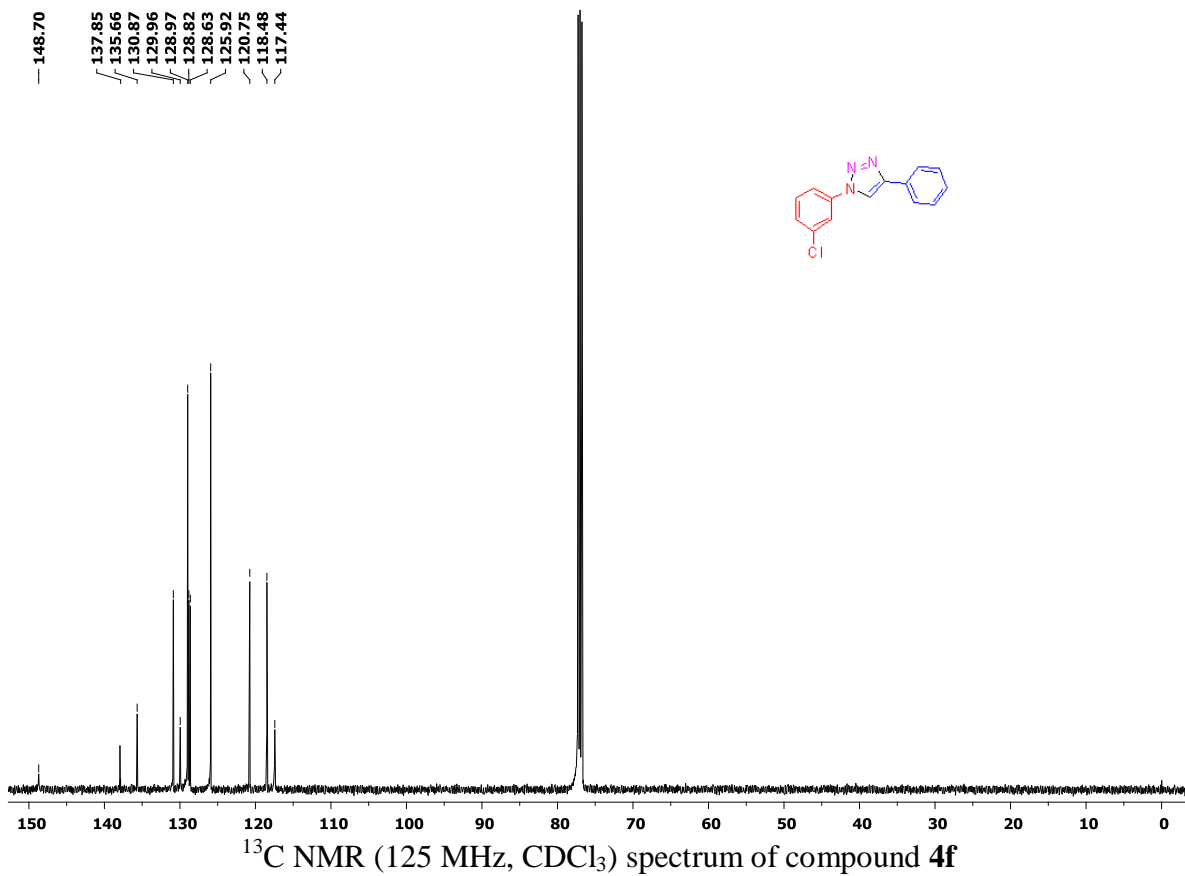

<sup>13</sup>C NMR (125 MHz, CDCl<sub>3</sub>) spectrum of compound 4f

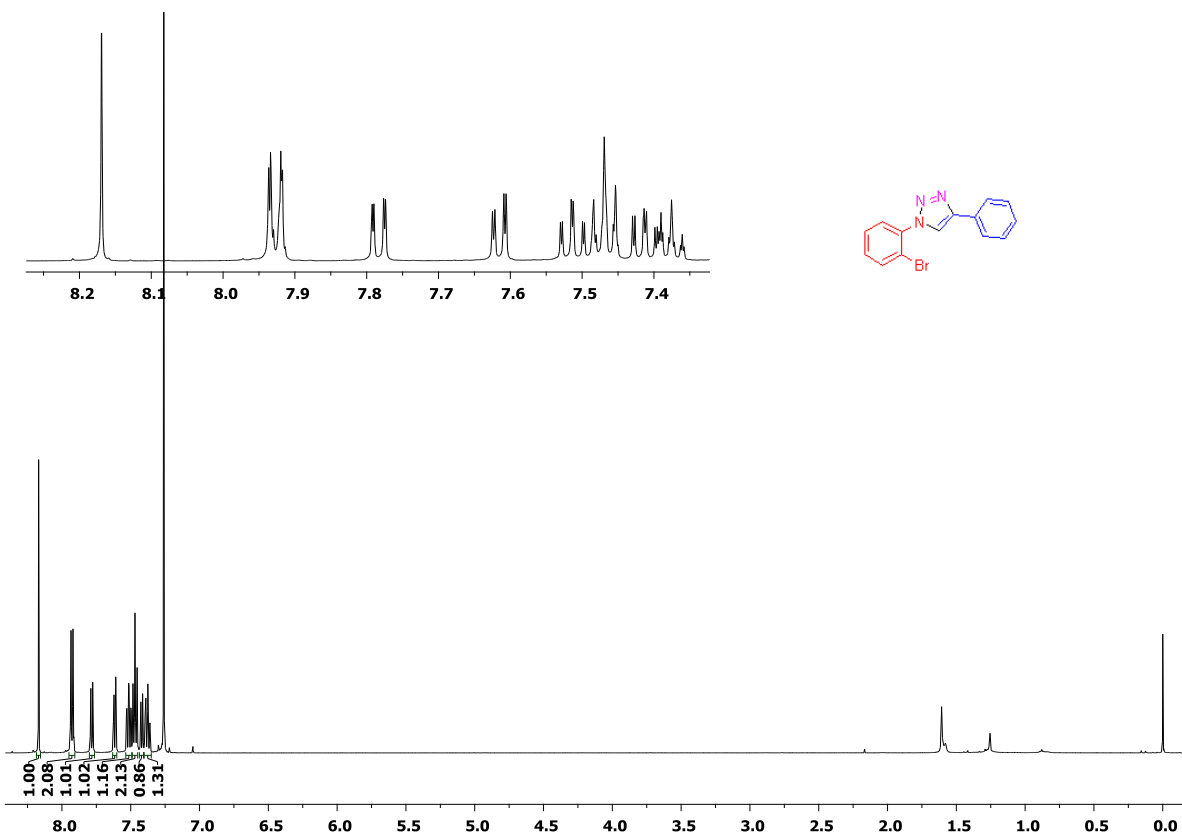

$^1\text{H}$  NMR (500 MHz,  $\text{CDCl}_3$ ) spectrum of compound **4g**

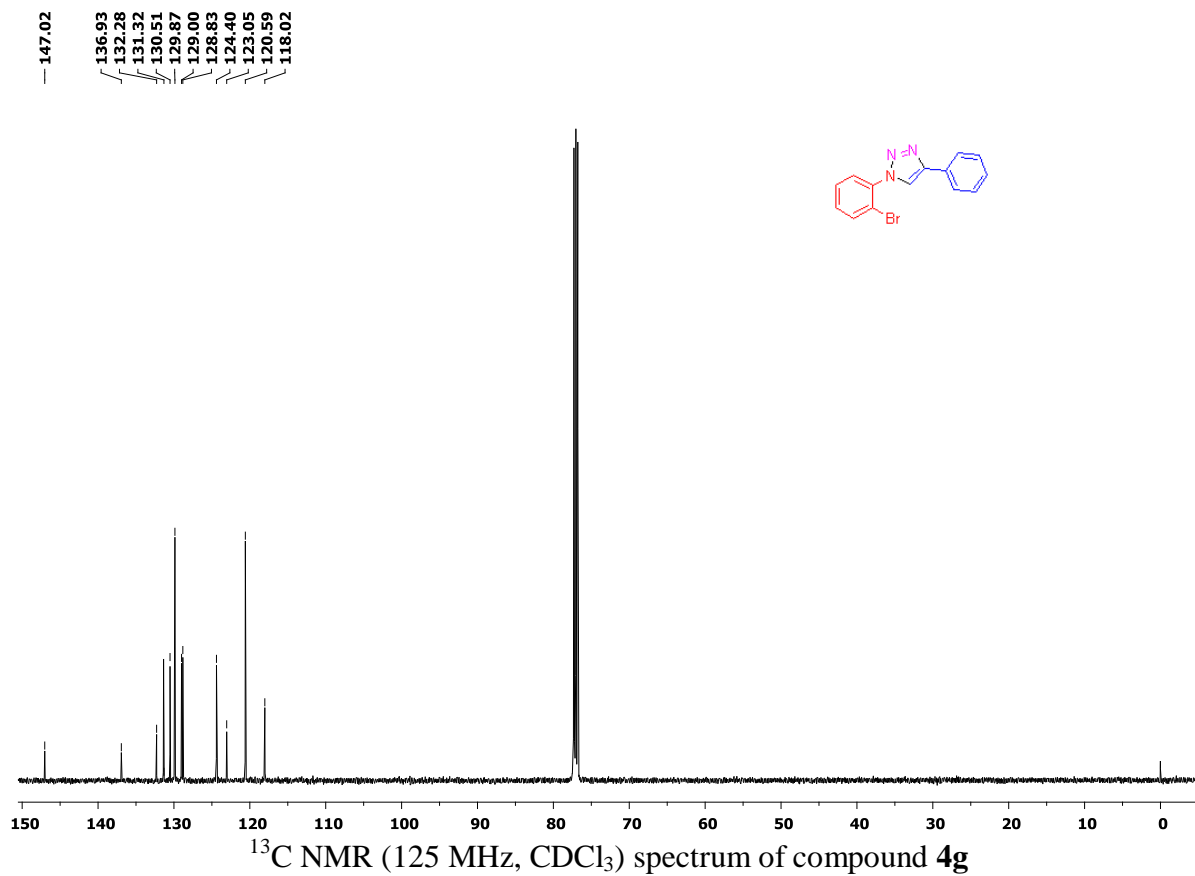

$^{13}\text{C}$  NMR (125 MHz,  $\text{CDCl}_3$ ) spectrum of compound **4g**



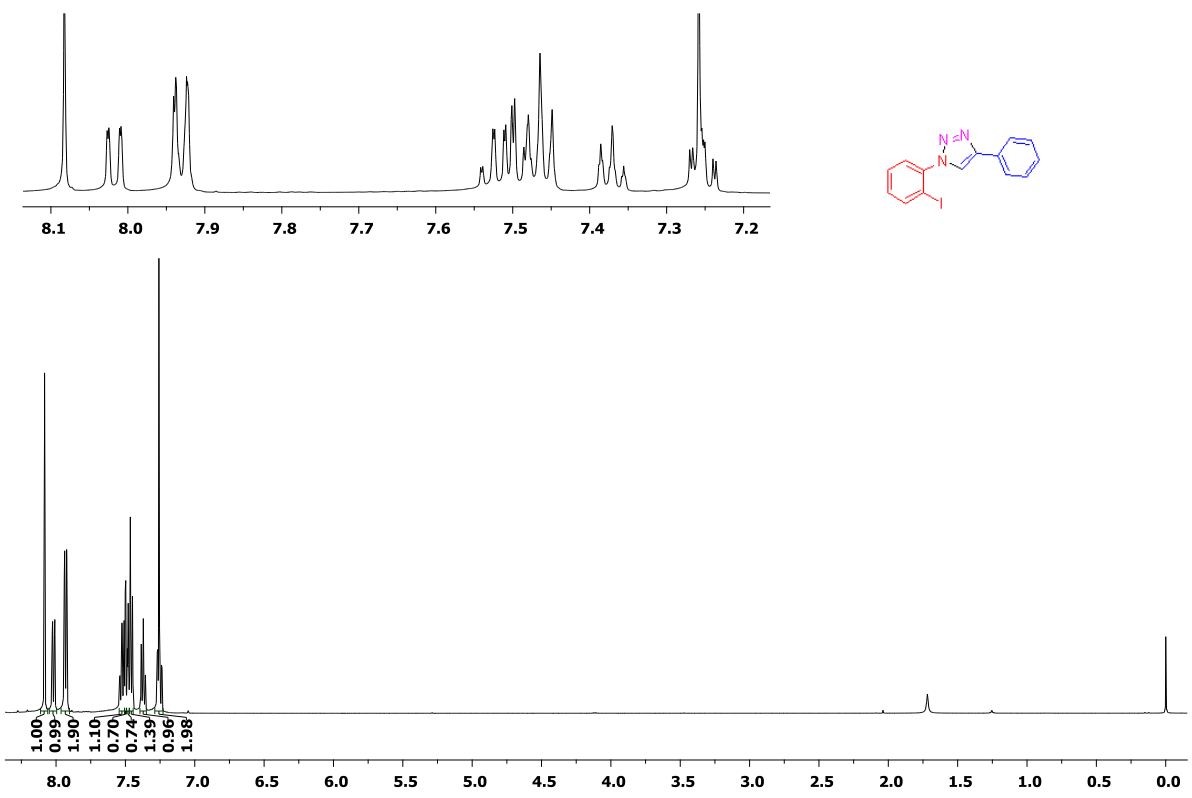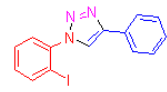

$^1\text{H}$  NMR (500 MHz,  $\text{CDCl}_3$ ) spectrum of compound **4h**

- 147.65
- 140.32
- 140.10
- 131.55
- 130.26
- 129.33
- 128.96
- 128.37
- 127.88
- 125.94
- 121.61
- 93.91

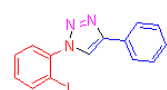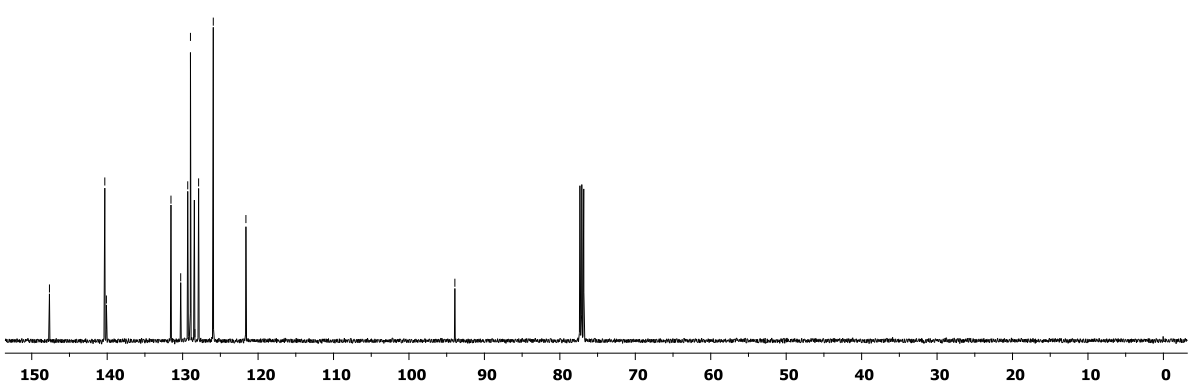

$^{13}\text{C}$  NMR (125 MHz,  $\text{CDCl}_3$ ) spectrum of compound **4h**

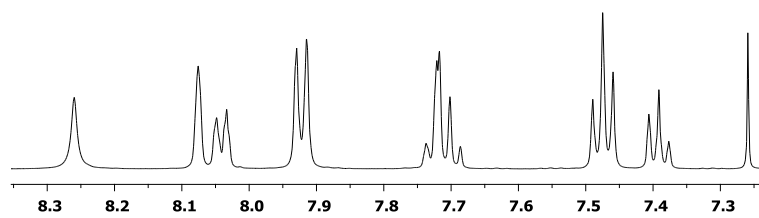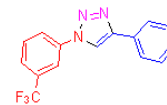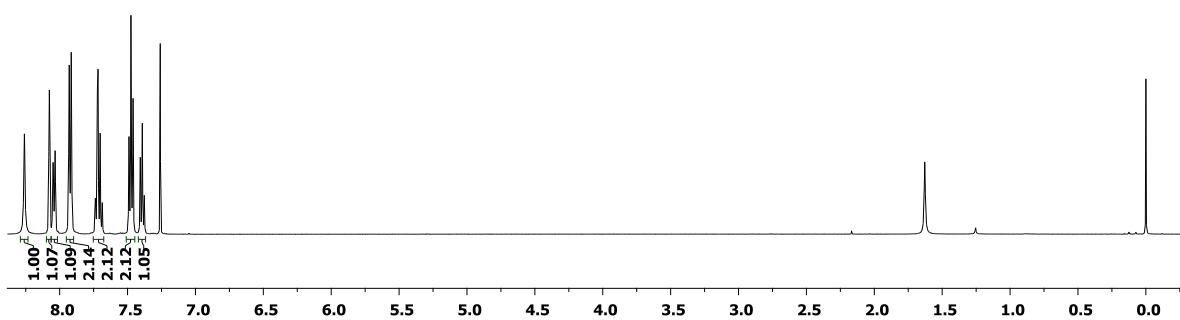

<sup>1</sup>H NMR (500 MHz, CDCl<sub>3</sub>) spectrum of compound **4i**

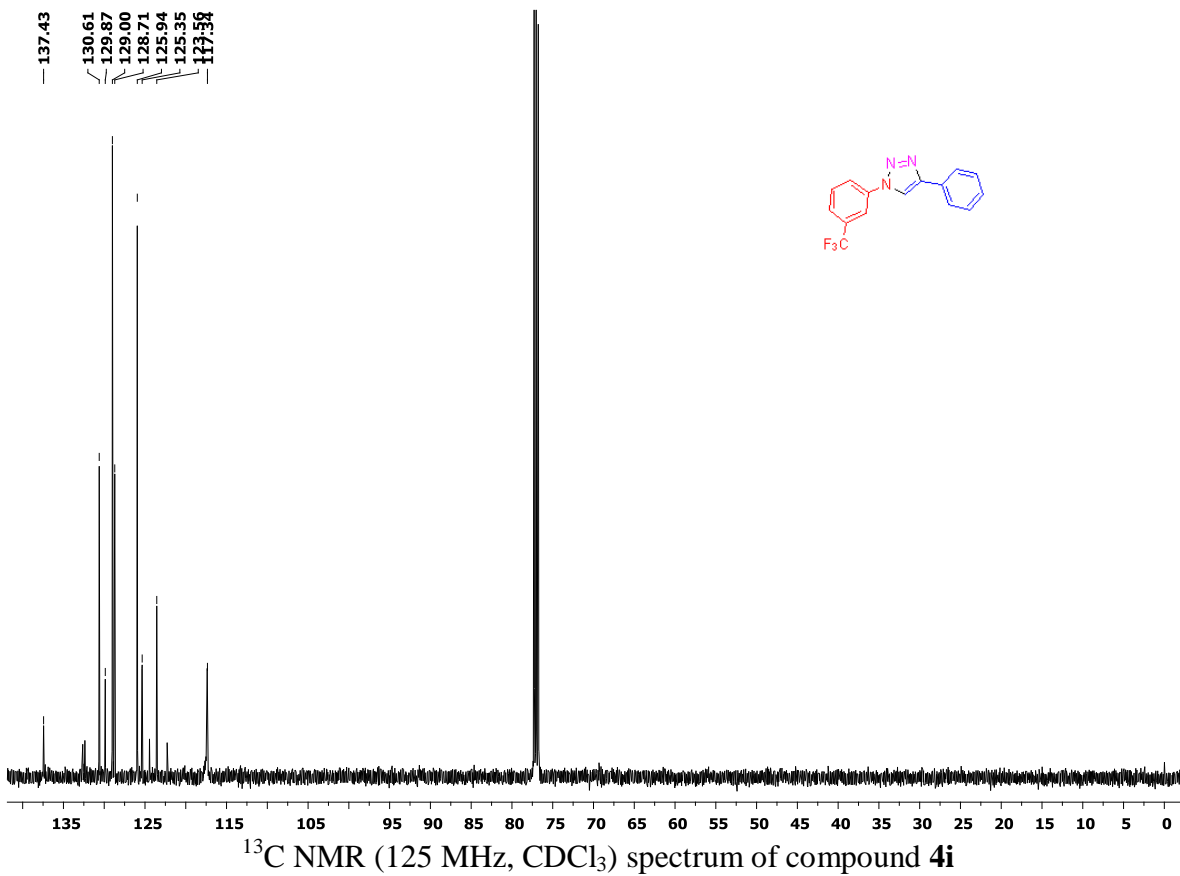

<sup>13</sup>C NMR (125 MHz, CDCl<sub>3</sub>) spectrum of compound **4i**

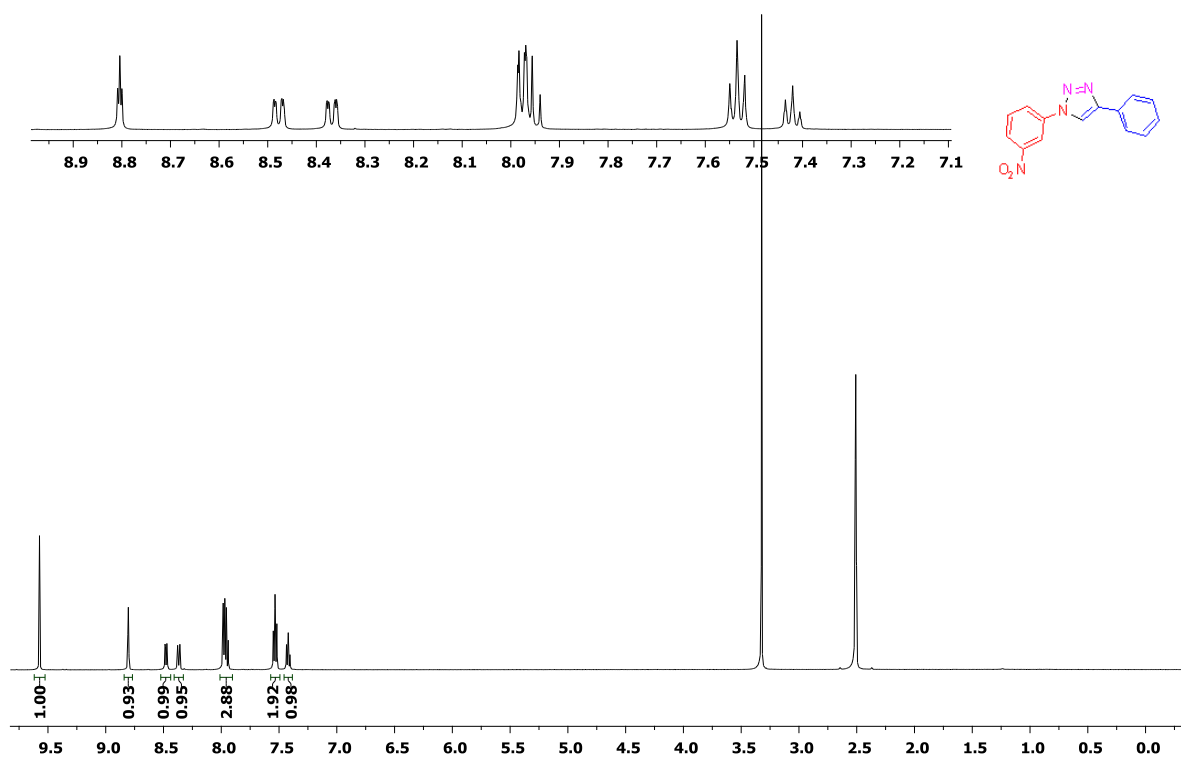

<sup>1</sup>H NMR (500 MHz, DMSO) spectrum of compound **4j**

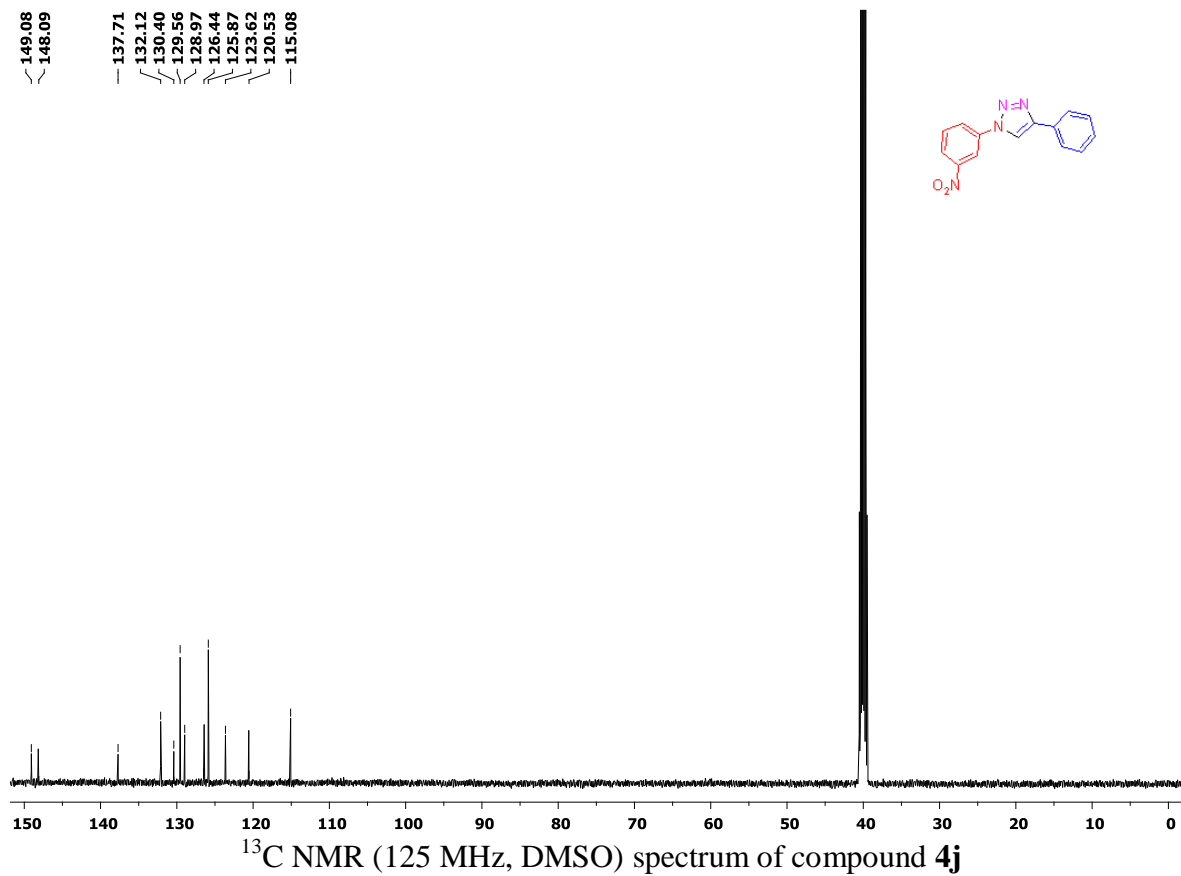

<sup>13</sup>C NMR (125 MHz, DMSO) spectrum of compound **4j**

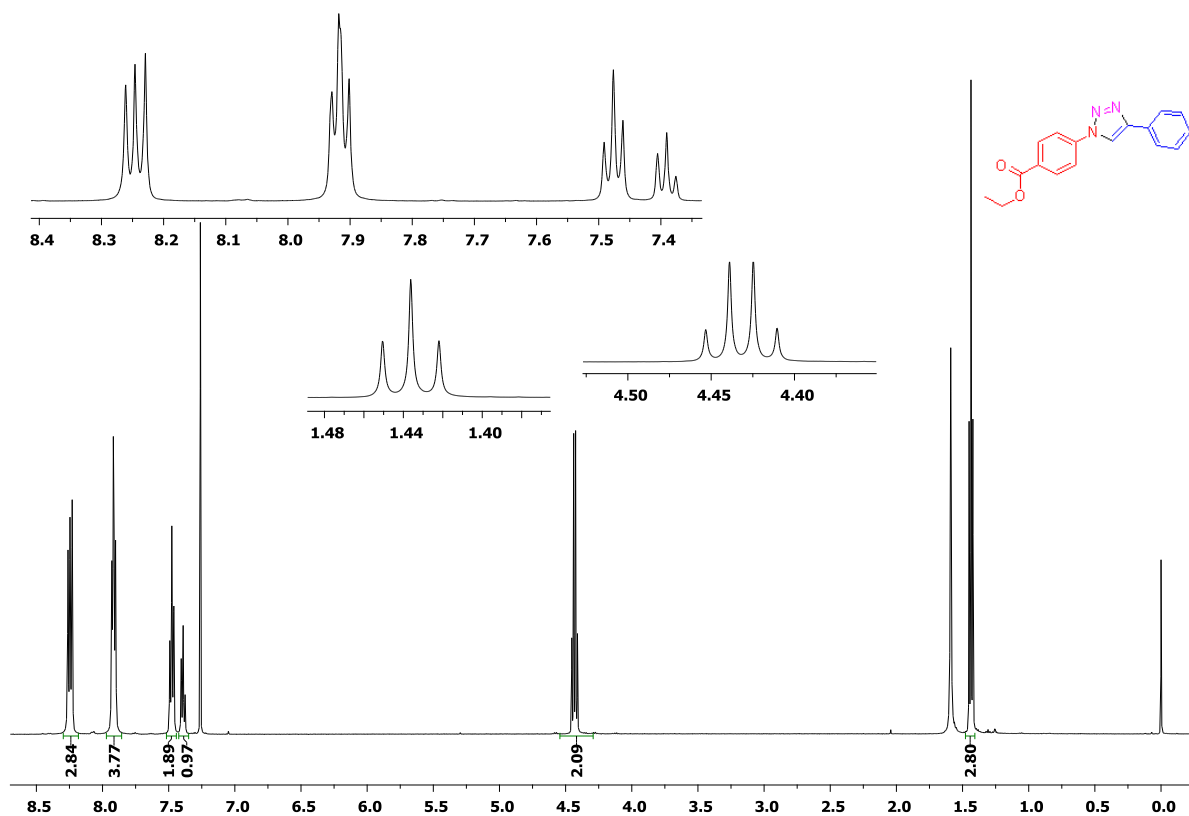

$^1\text{H NMR}$  (500 MHz,  $\text{CDCl}_3$ ) spectrum of compound **4k**

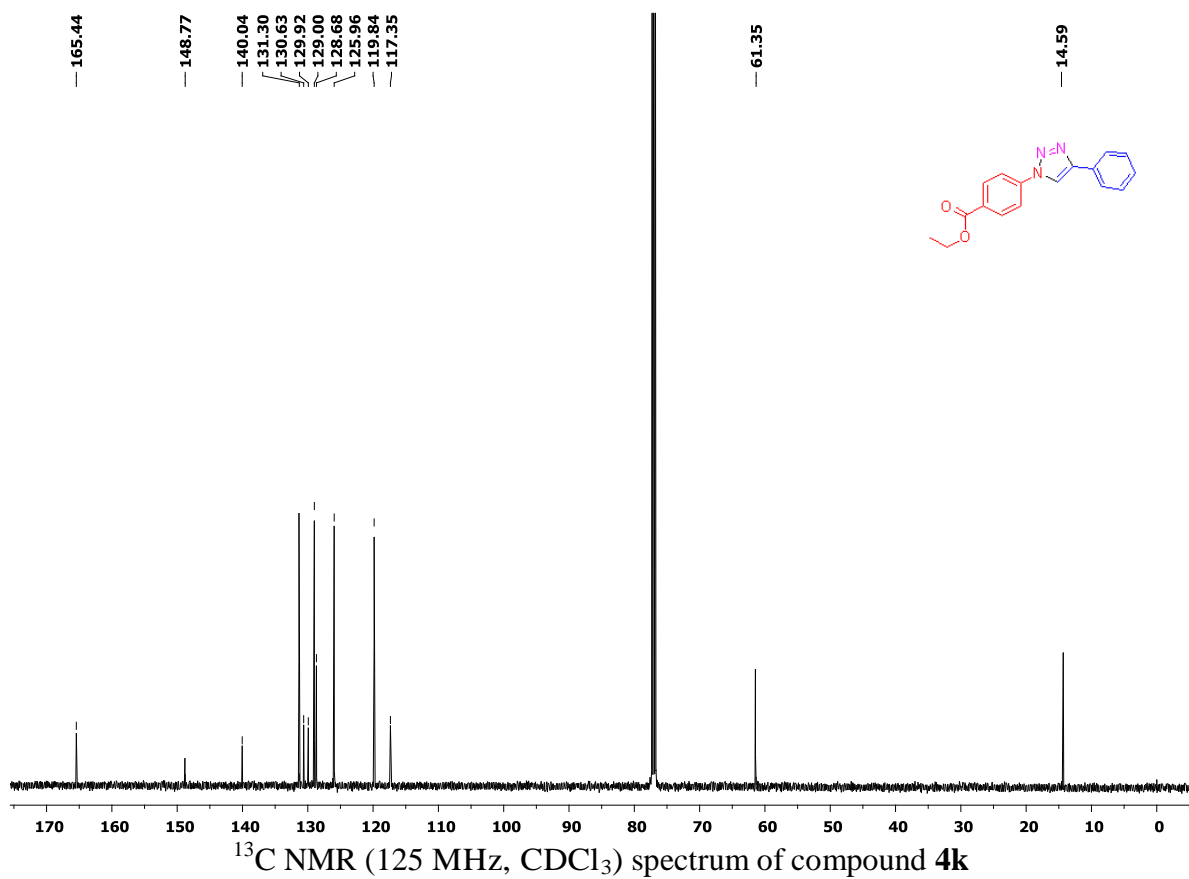

$^{13}\text{C NMR}$  (125 MHz,  $\text{CDCl}_3$ ) spectrum of compound **4k**

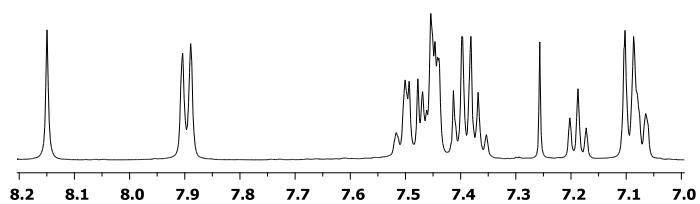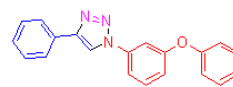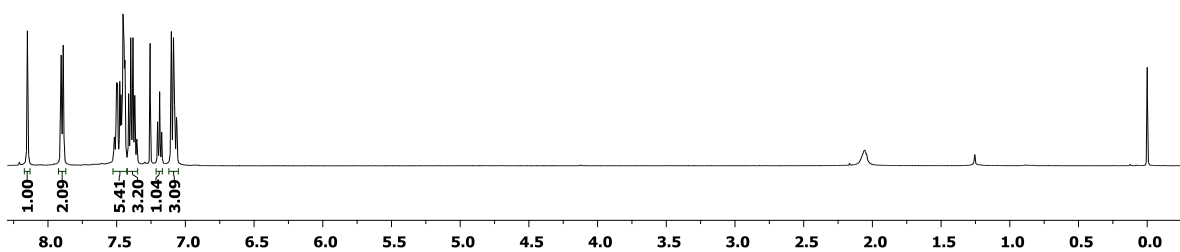

$^1\text{H}$  NMR (500 MHz,  $\text{CDCl}_3$ ) spectrum of compound **41**

158.85  
156.11  
148.40  
138.38  
130.92  
130.09  
128.86  
128.53  
125.93  
124.34  
119.61  
118.33  
117.68  
114.72  
110.62

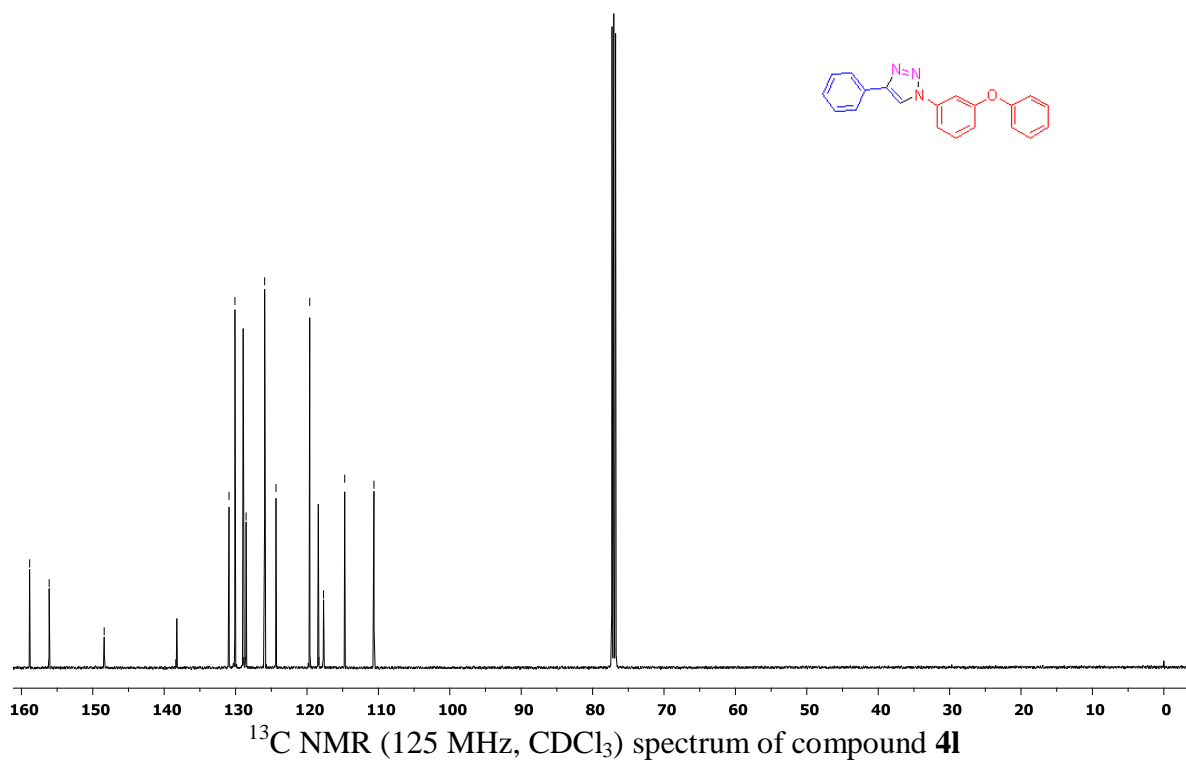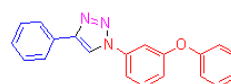

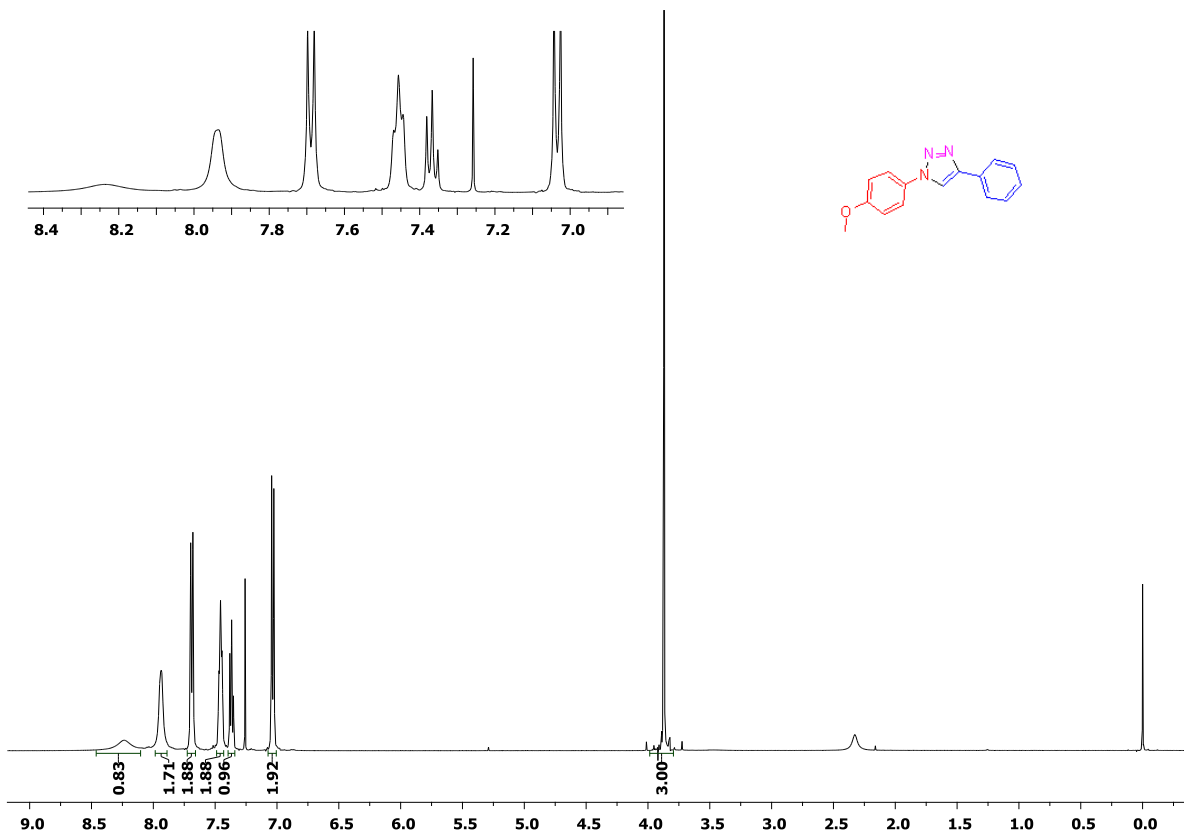

$^1\text{H}$  NMR (500 MHz,  $\text{CDCl}_3$ ) spectrum of compound **4m**

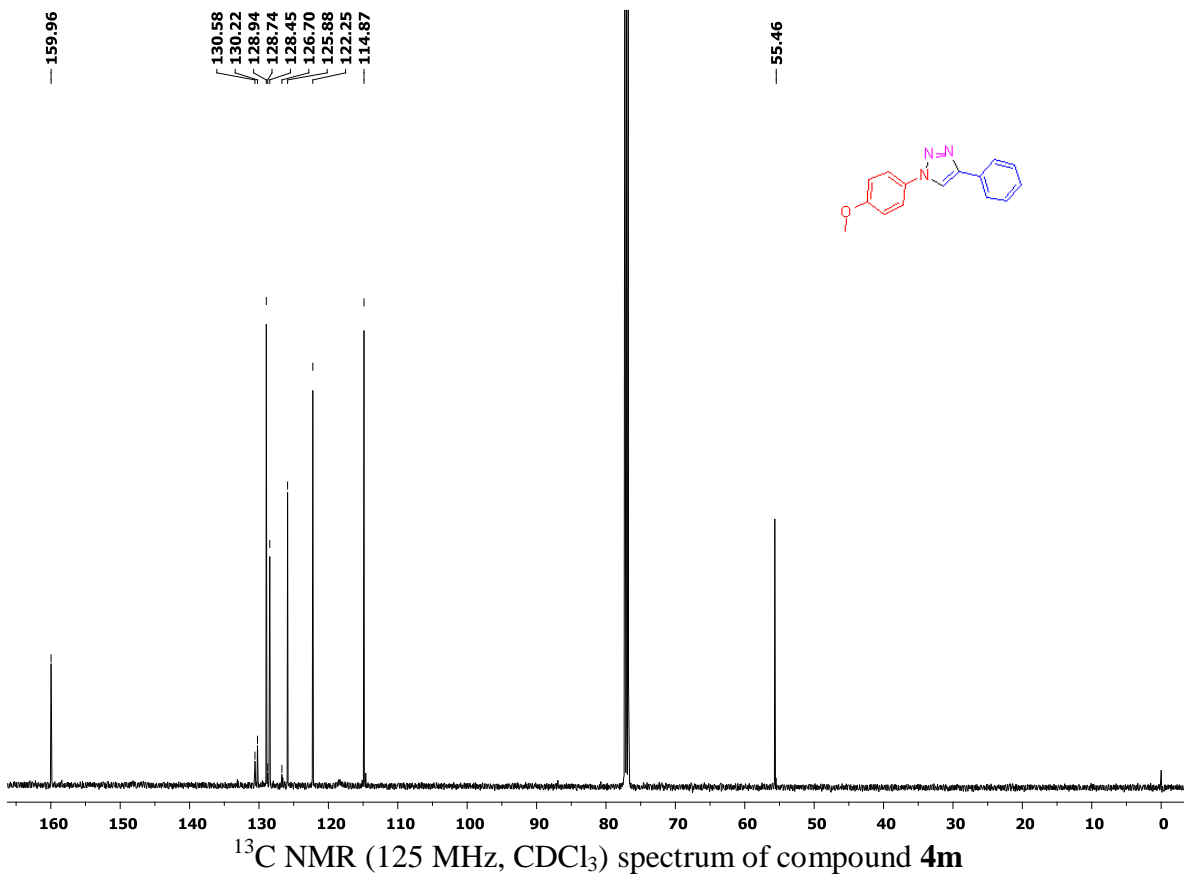

$^{13}\text{C}$  NMR (125 MHz,  $\text{CDCl}_3$ ) spectrum of compound **4m**

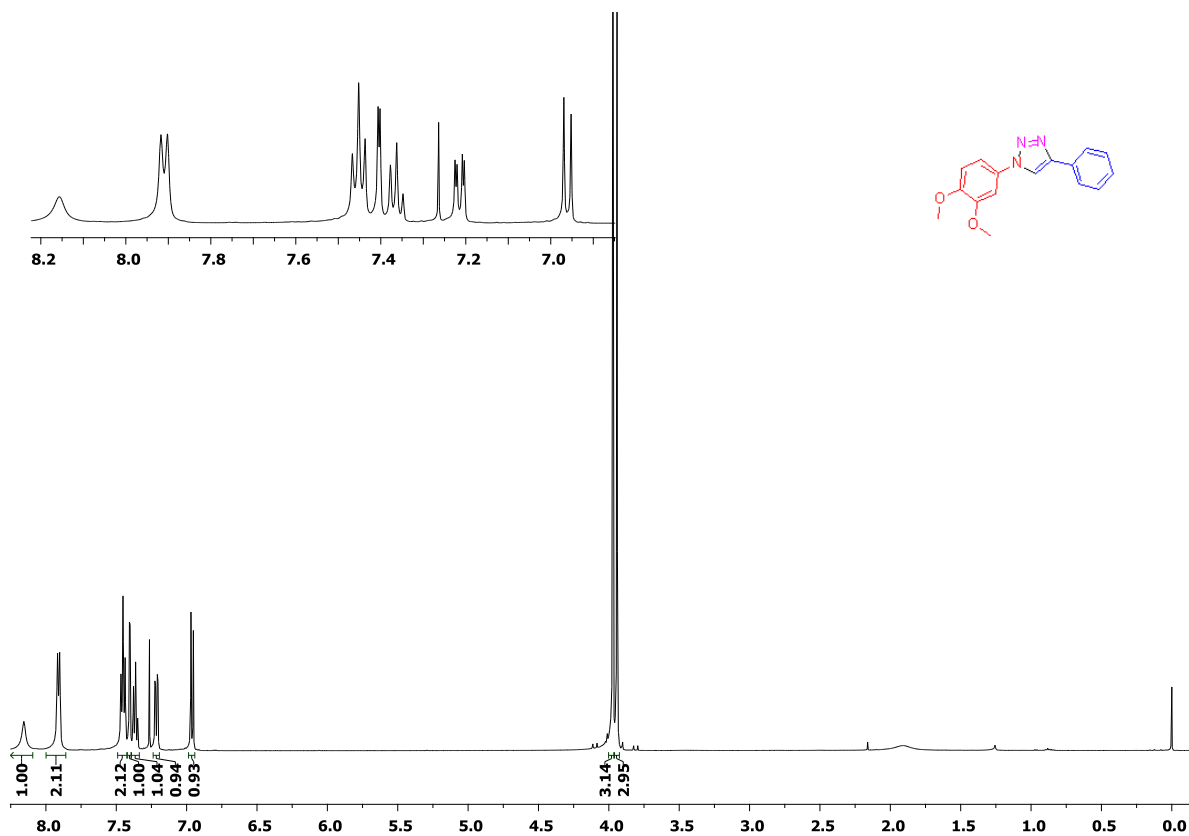

$^1\text{H}$  NMR (500 MHz,  $\text{CDCl}_3$ ) spectrum of compound **4n**

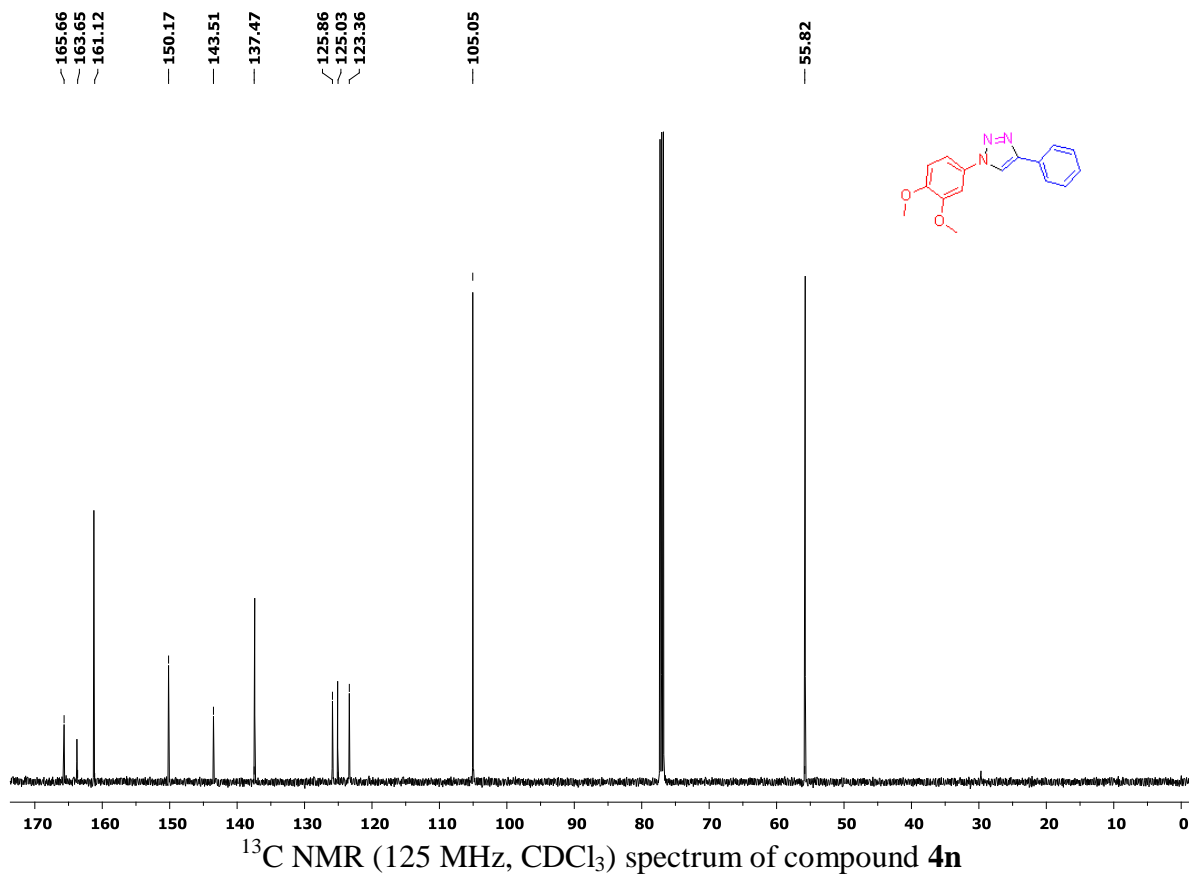

$^{13}\text{C}$  NMR (125 MHz,  $\text{CDCl}_3$ ) spectrum of compound **4n**

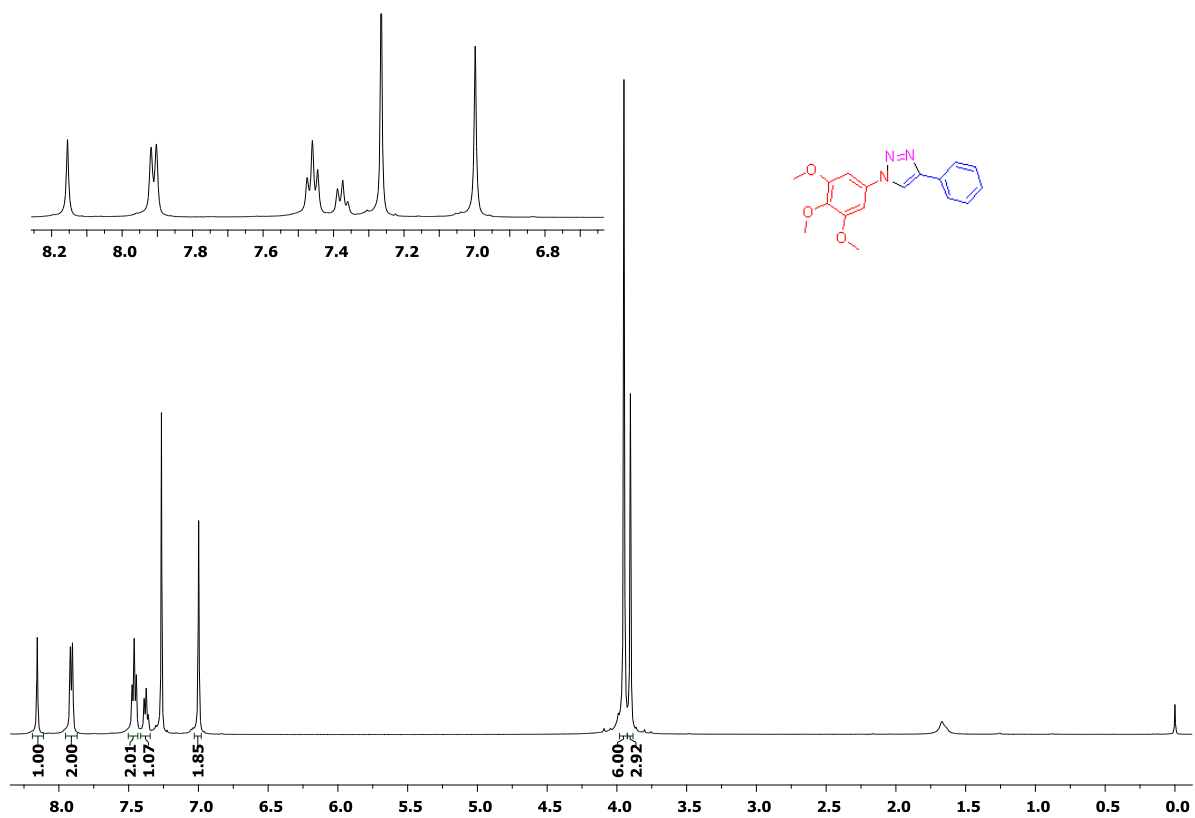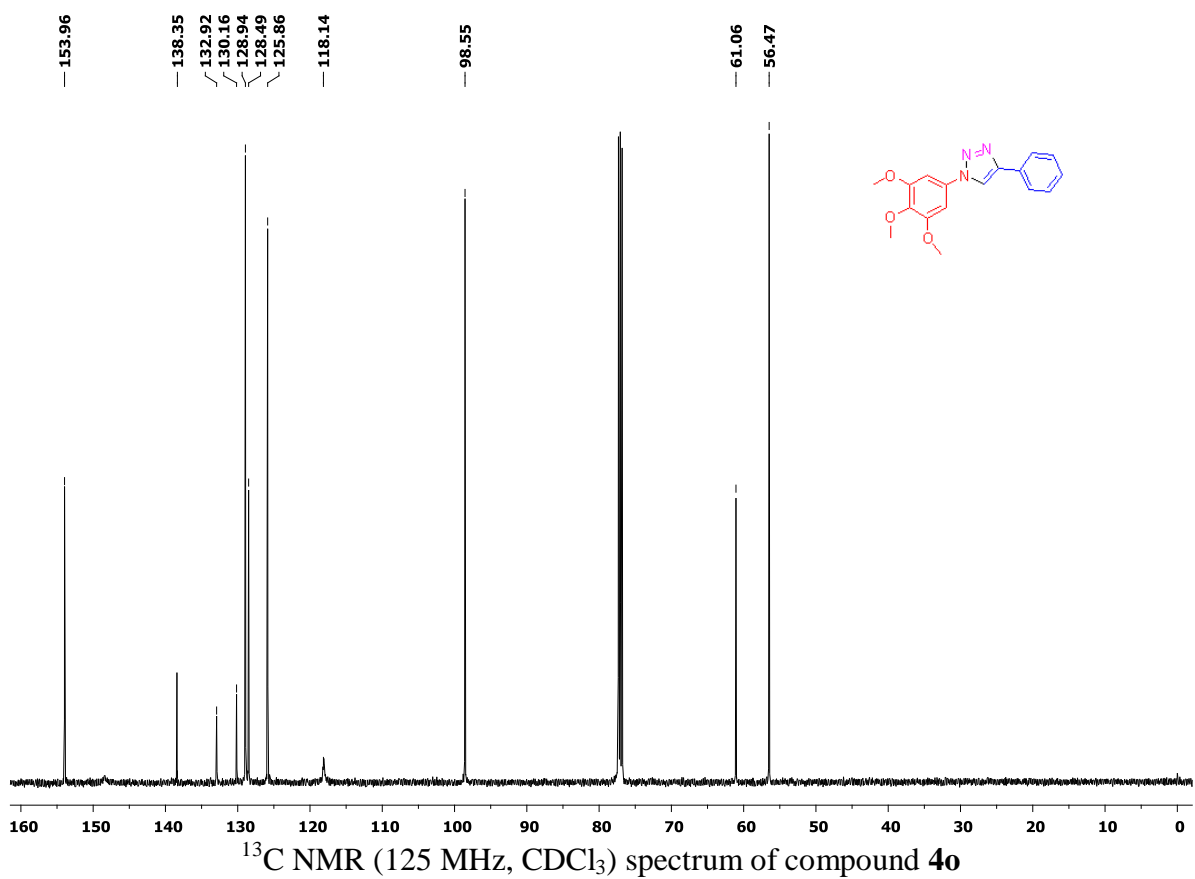



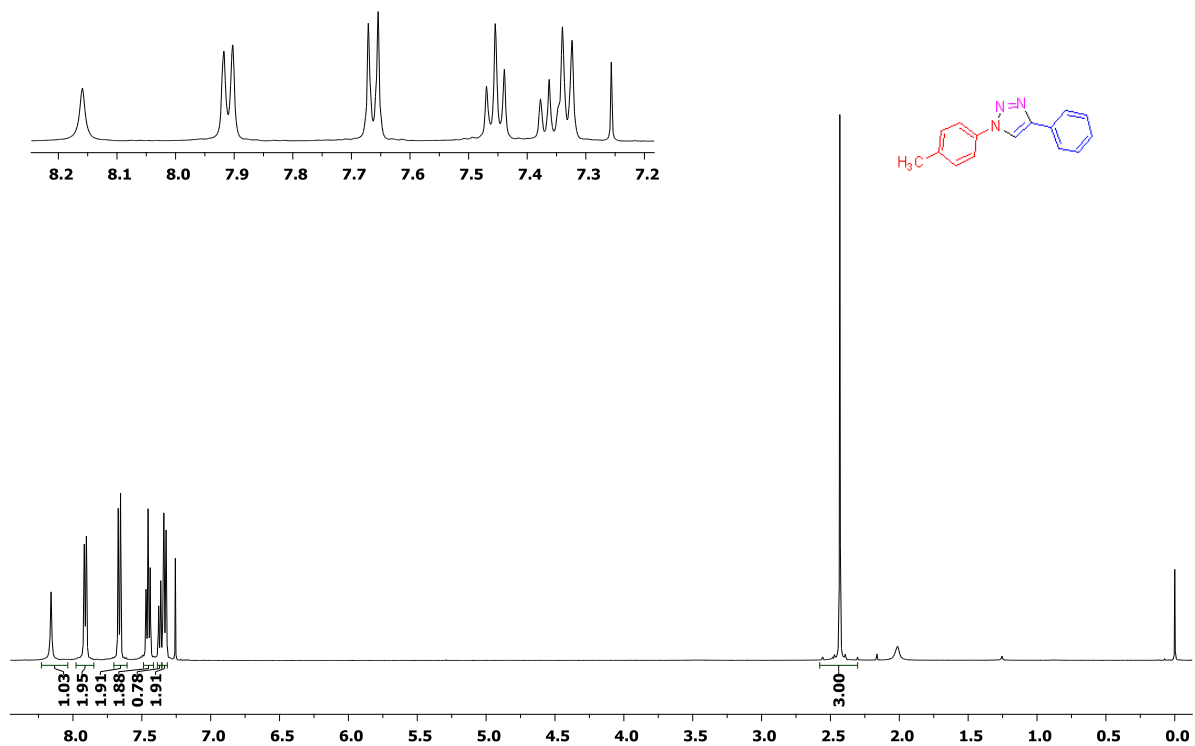

<sup>1</sup>H NMR (500 MHz, CDCl<sub>3</sub>) spectrum of compound **4p**

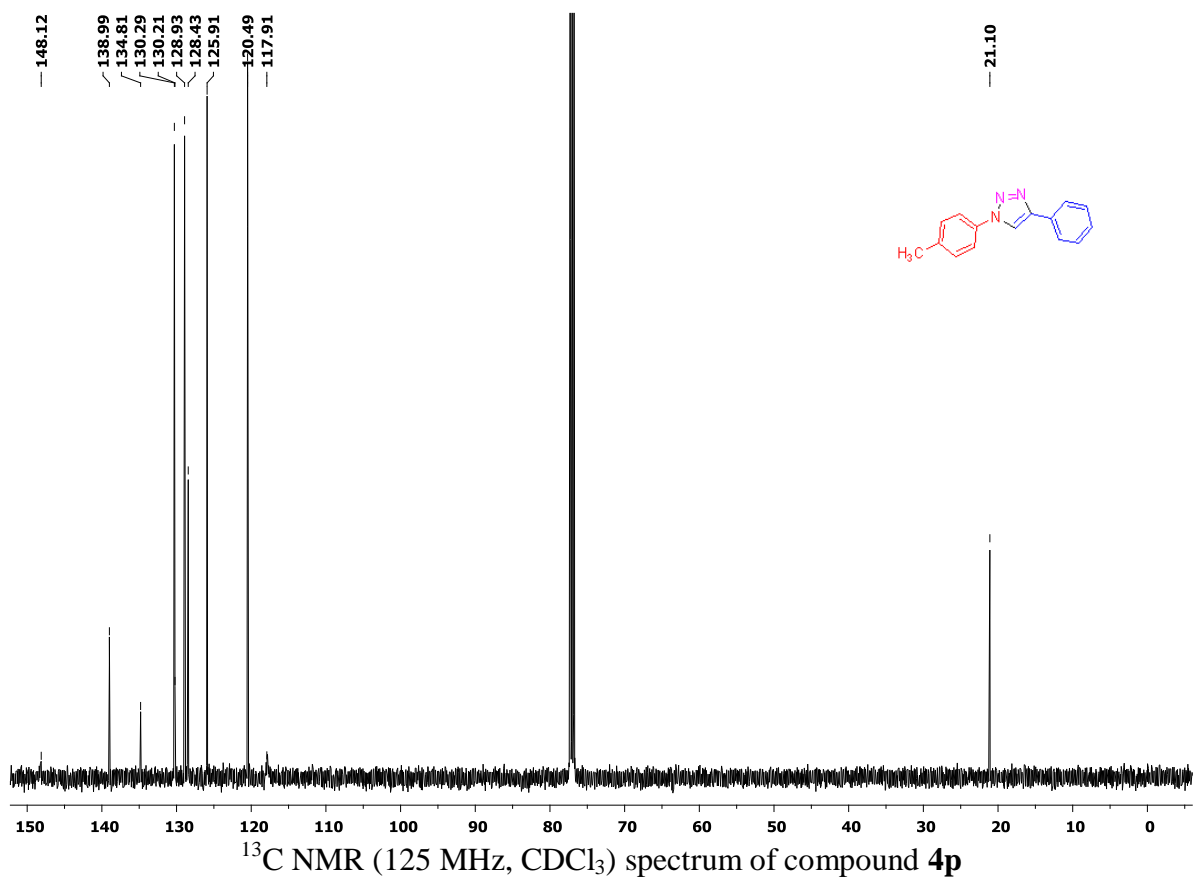

<sup>13</sup>C NMR (125 MHz, CDCl<sub>3</sub>) spectrum of compound **4p**

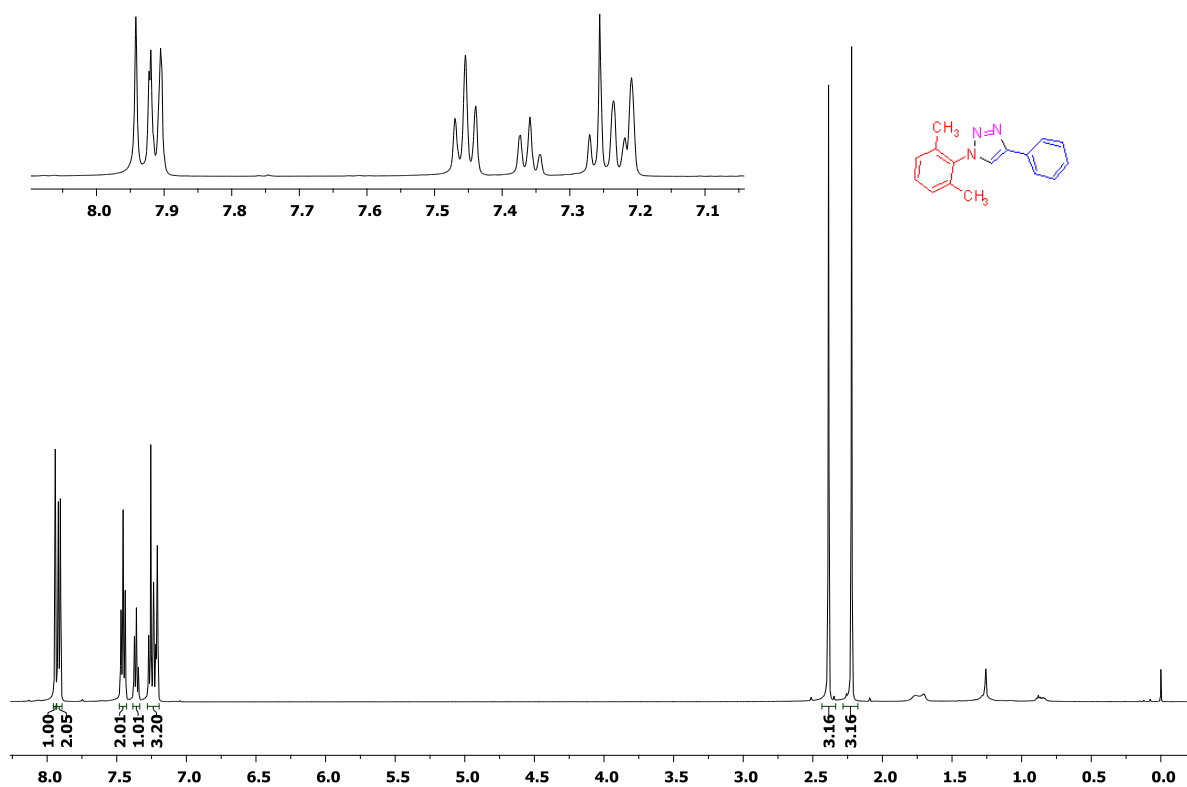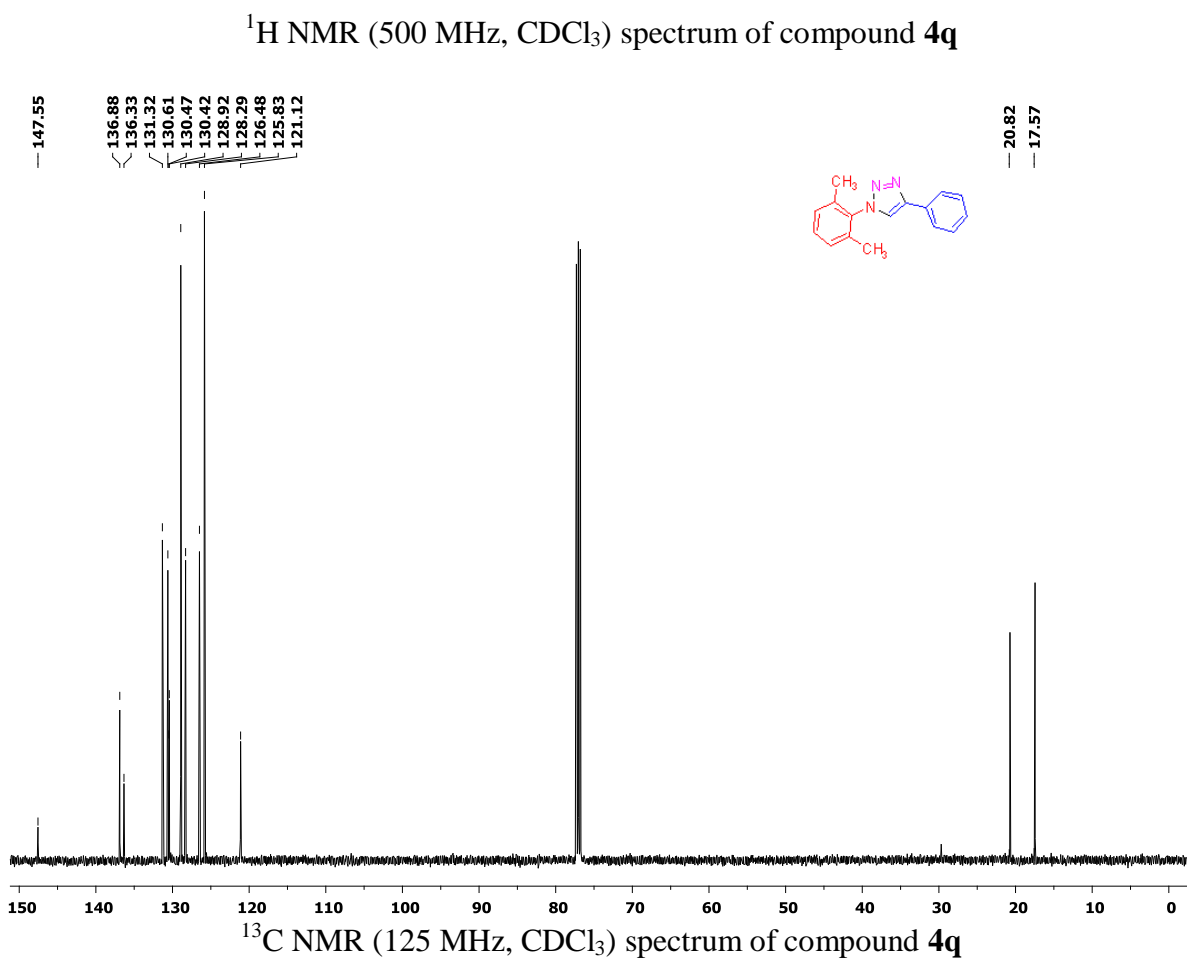

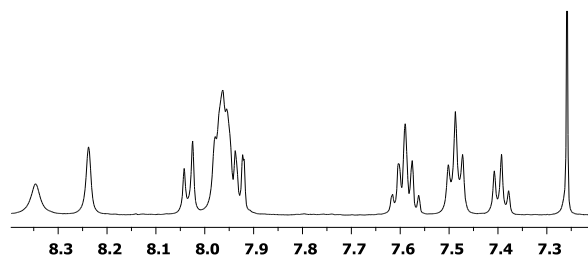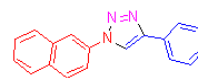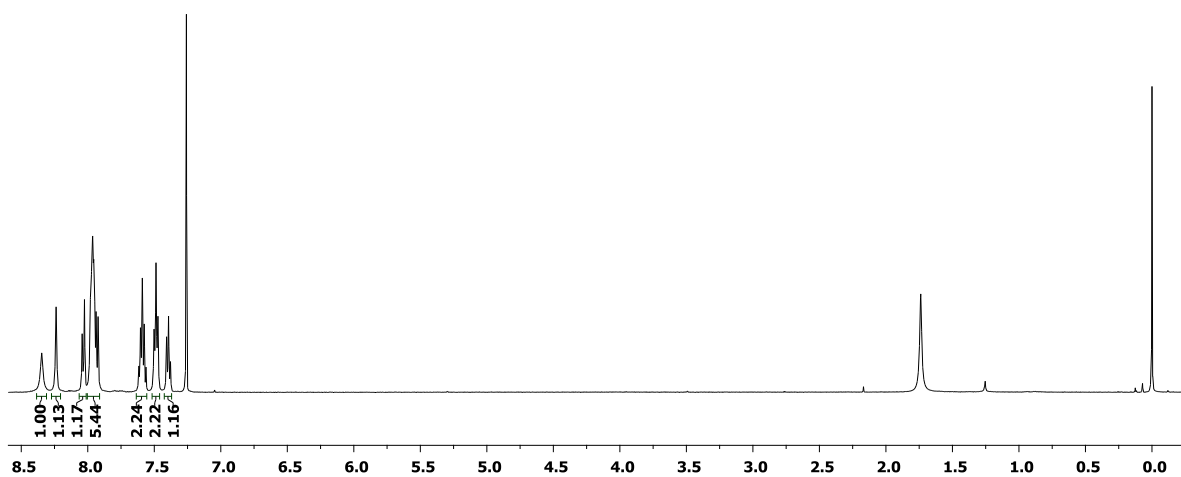

<sup>1</sup>H NMR (500 MHz, CDCl<sub>3</sub>) spectrum of compound **4r**

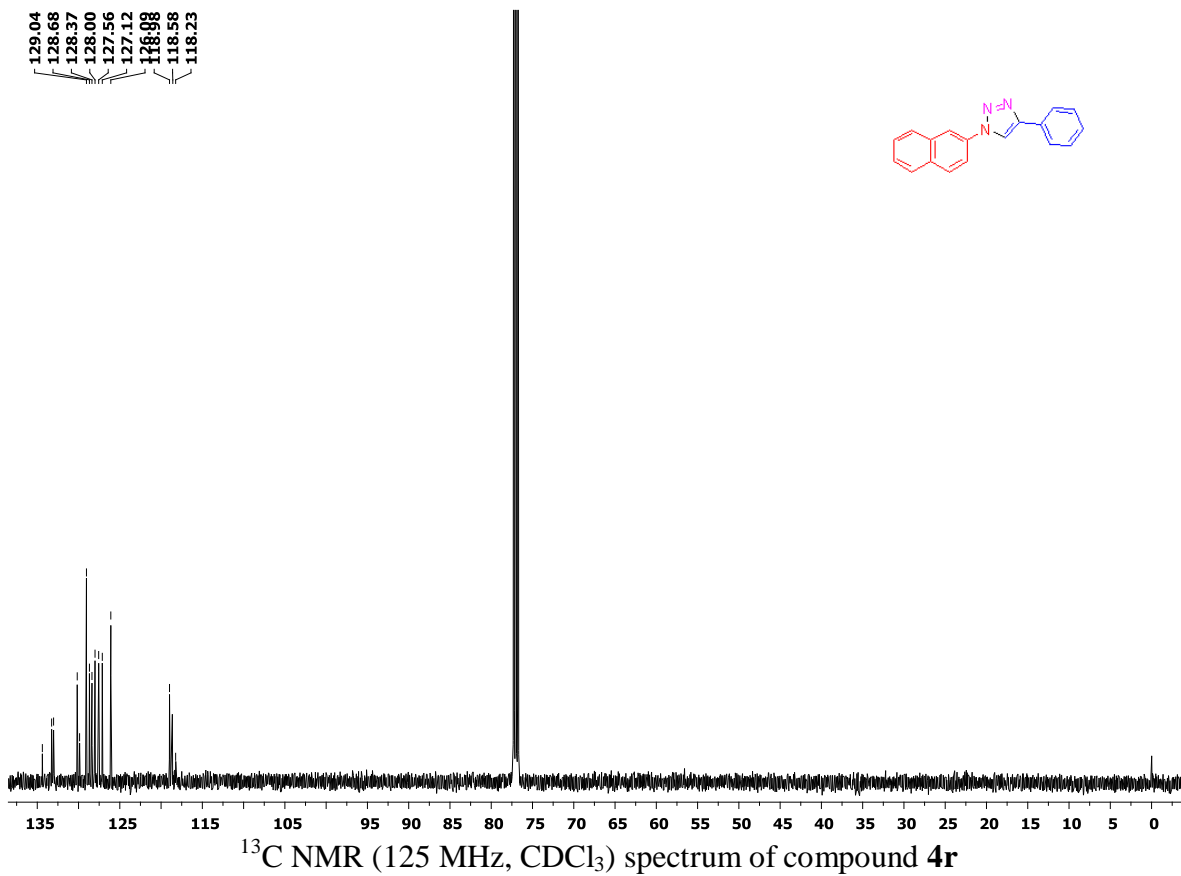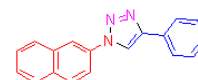

<sup>13</sup>C NMR (125 MHz, CDCl<sub>3</sub>) spectrum of compound **4r**

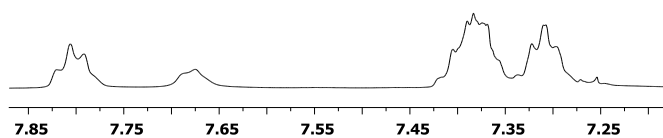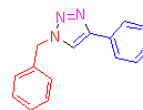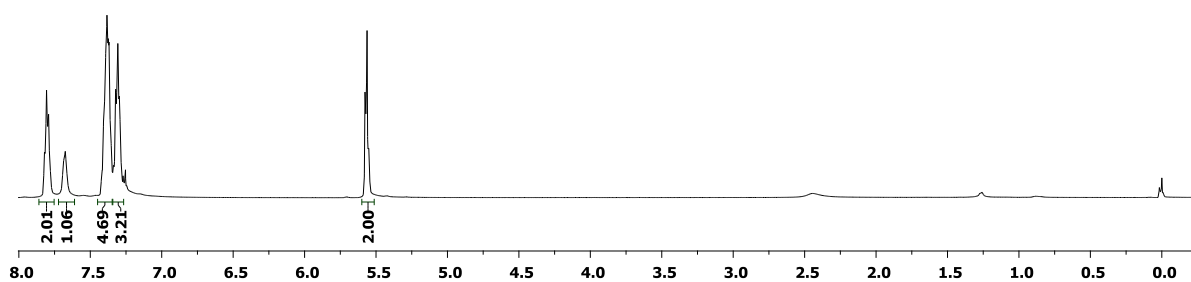

$^1\text{H}$  NMR (500 MHz,  $\text{CDCl}_3$ ) spectrum of compound **4s**

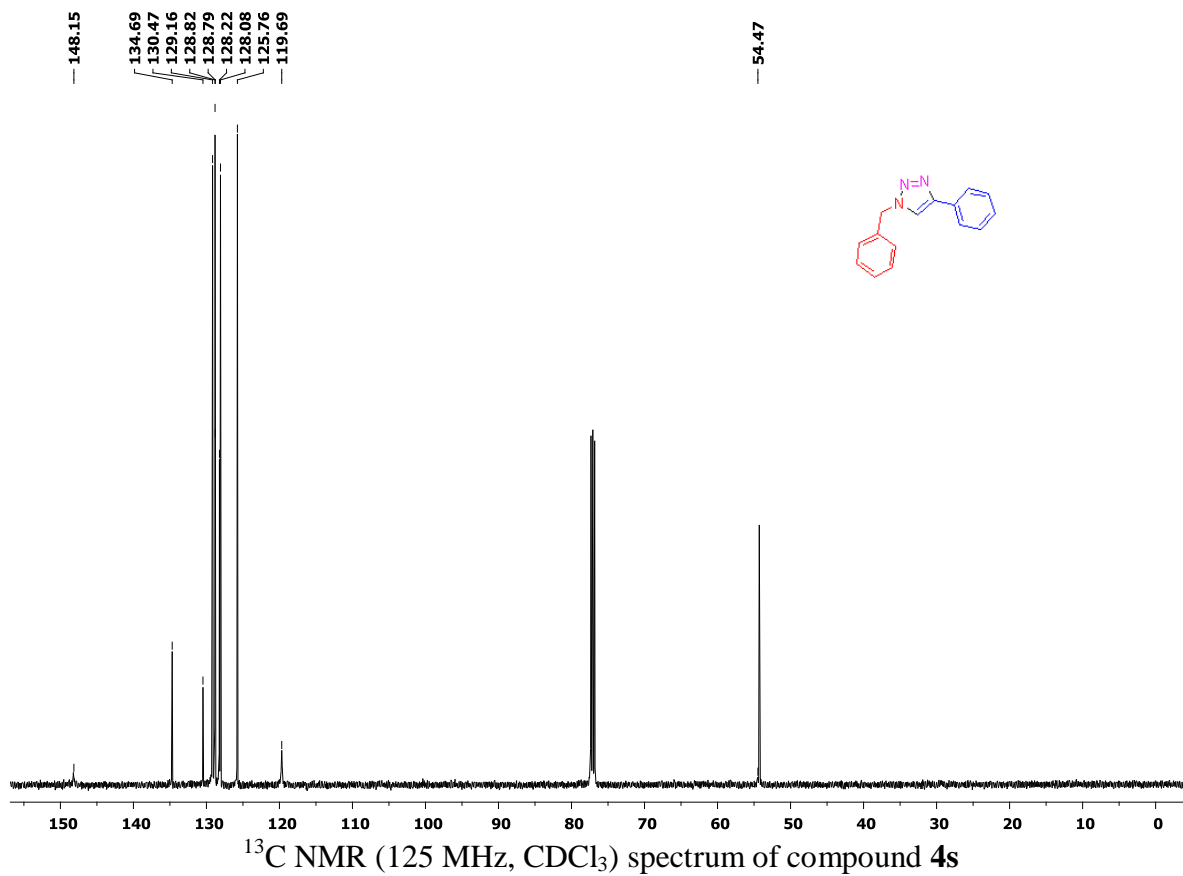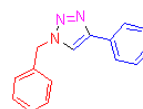

$^{13}\text{C}$  NMR (125 MHz,  $\text{CDCl}_3$ ) spectrum of compound **4s**

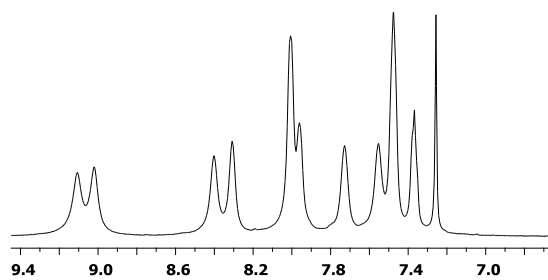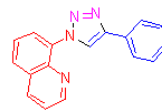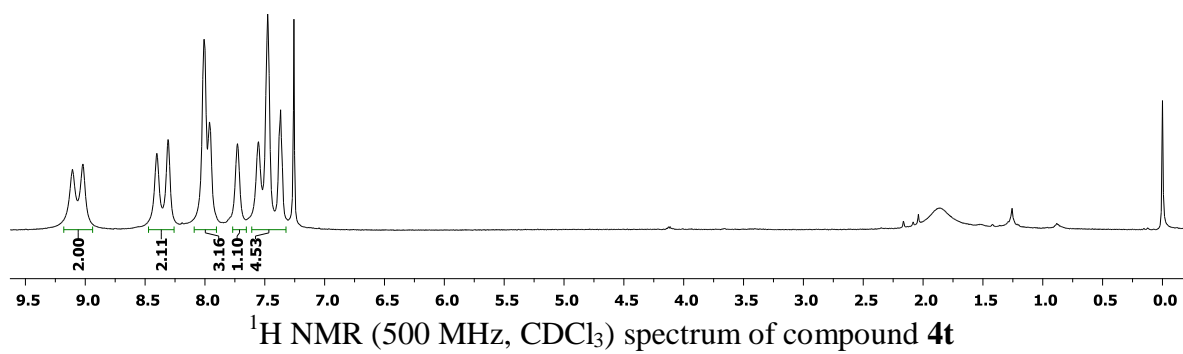

<sup>1</sup>H NMR (500 MHz, CDCl<sub>3</sub>) spectrum of compound 4t

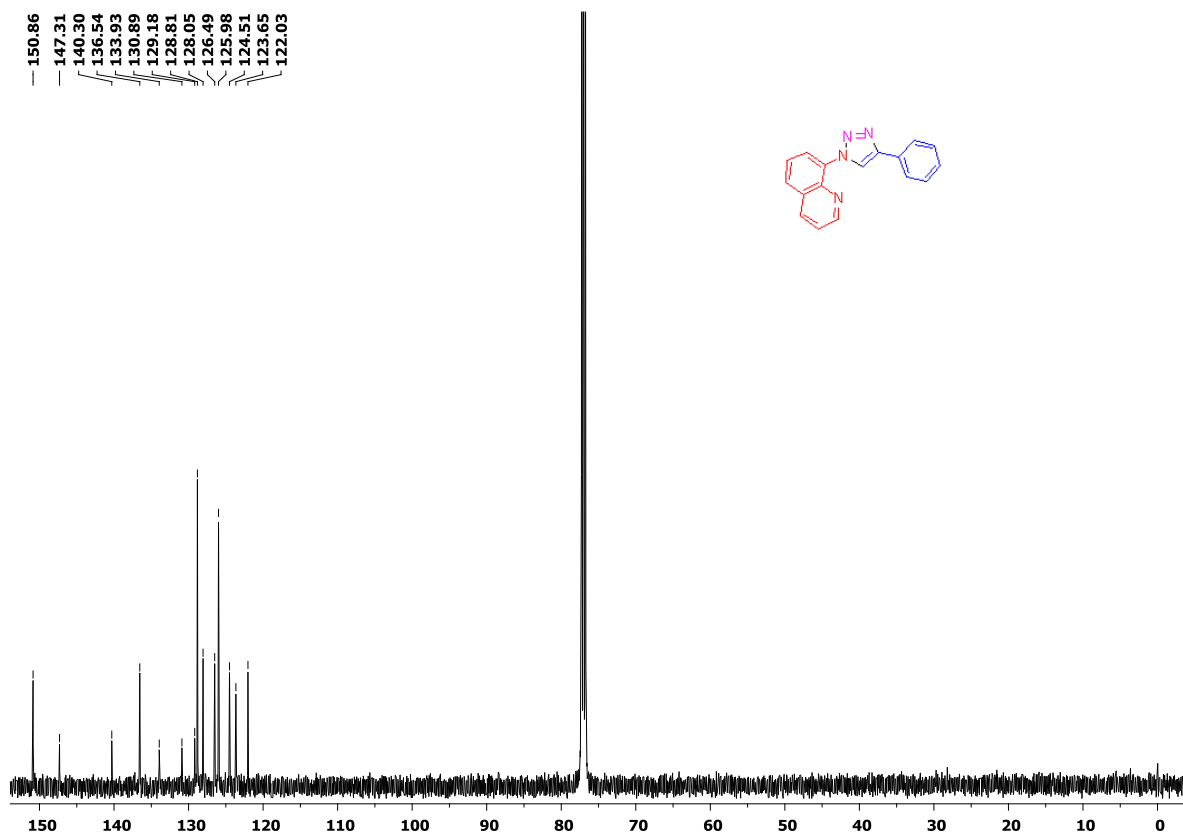

<sup>13</sup>C NMR (125 MHz, CDCl<sub>3</sub>) spectrum of compound 4t

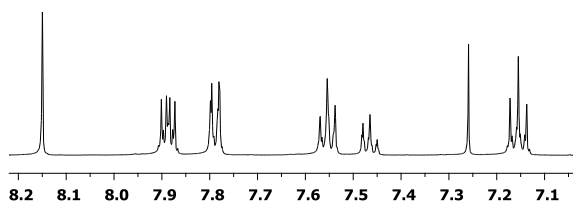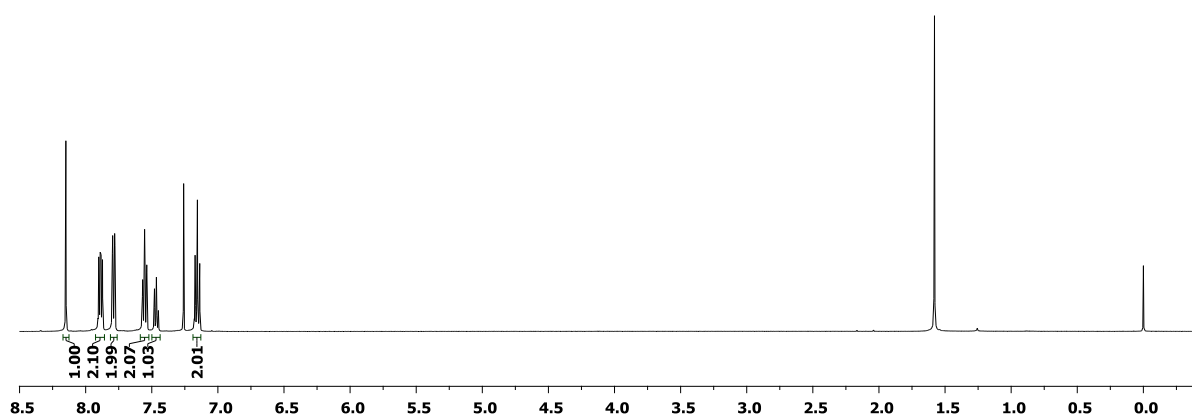

$^1\text{H NMR}$  (500 MHz,  $\text{CDCl}_3$ ) spectrum of compound **4u**

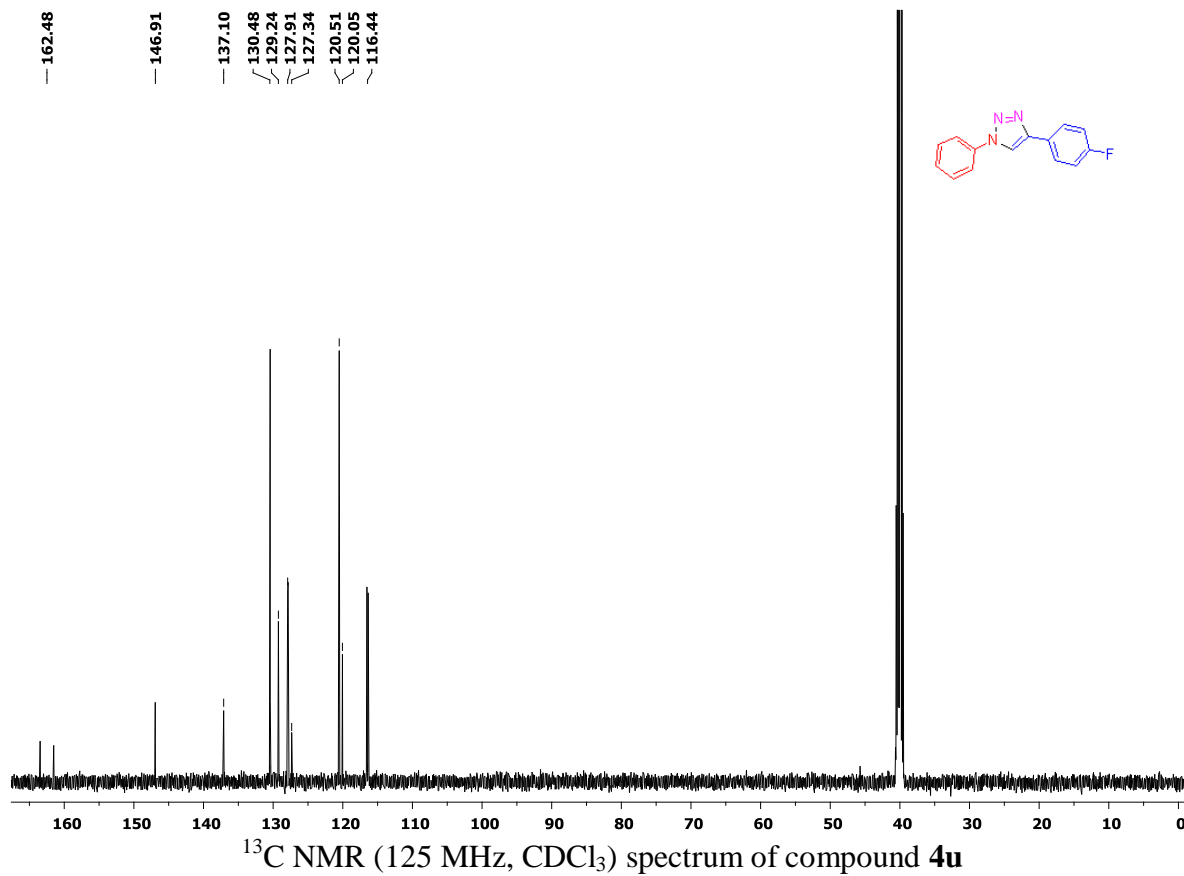

$^{13}\text{C NMR}$  (125 MHz,  $\text{CDCl}_3$ ) spectrum of compound **4u**

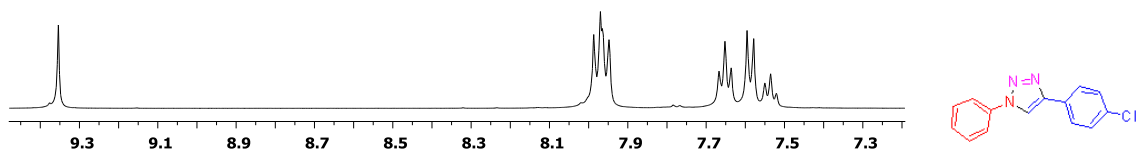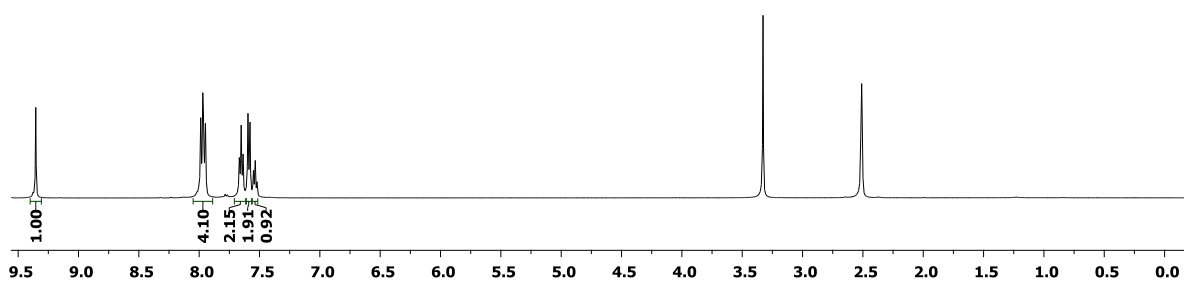

$^1\text{H}$  NMR (500 MHz, DMSO) spectrum of compound **4v**

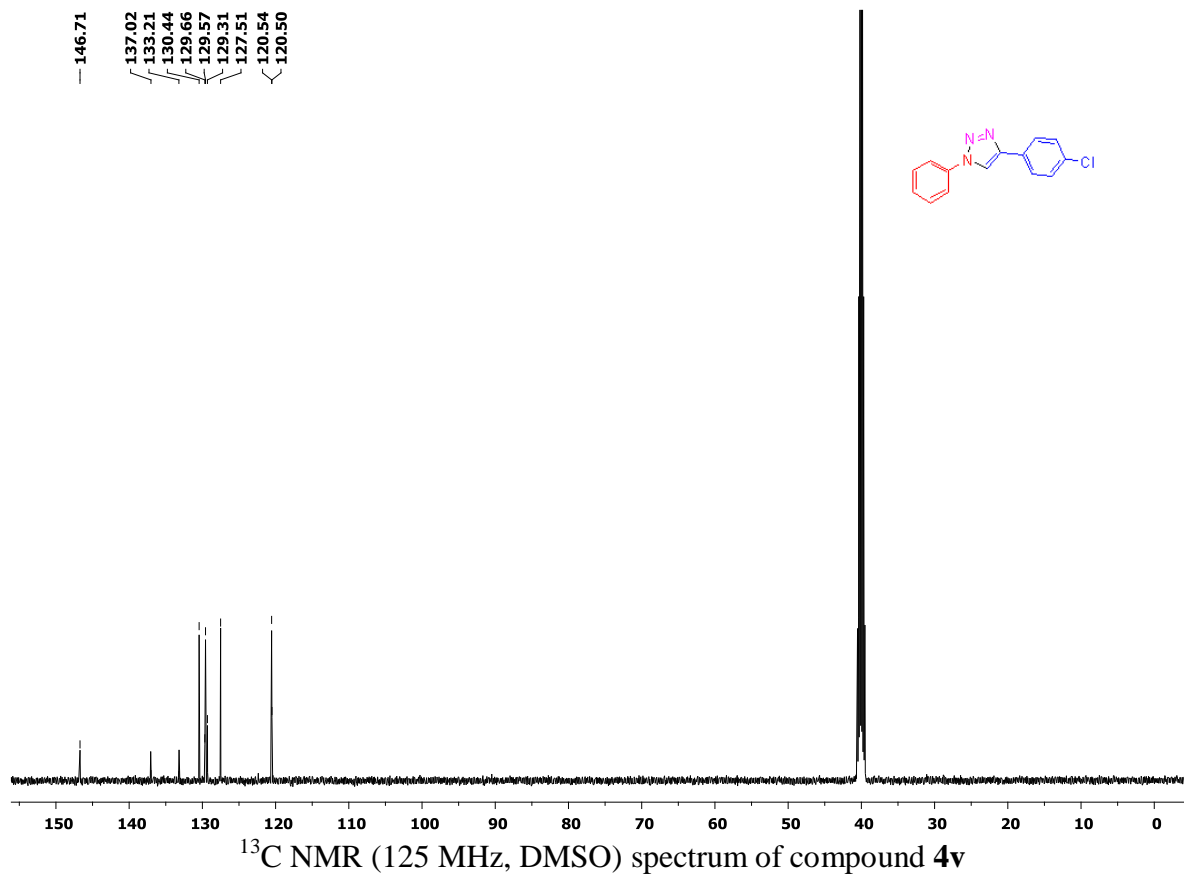

$^{13}\text{C}$  NMR (125 MHz, DMSO) spectrum of compound **4v**

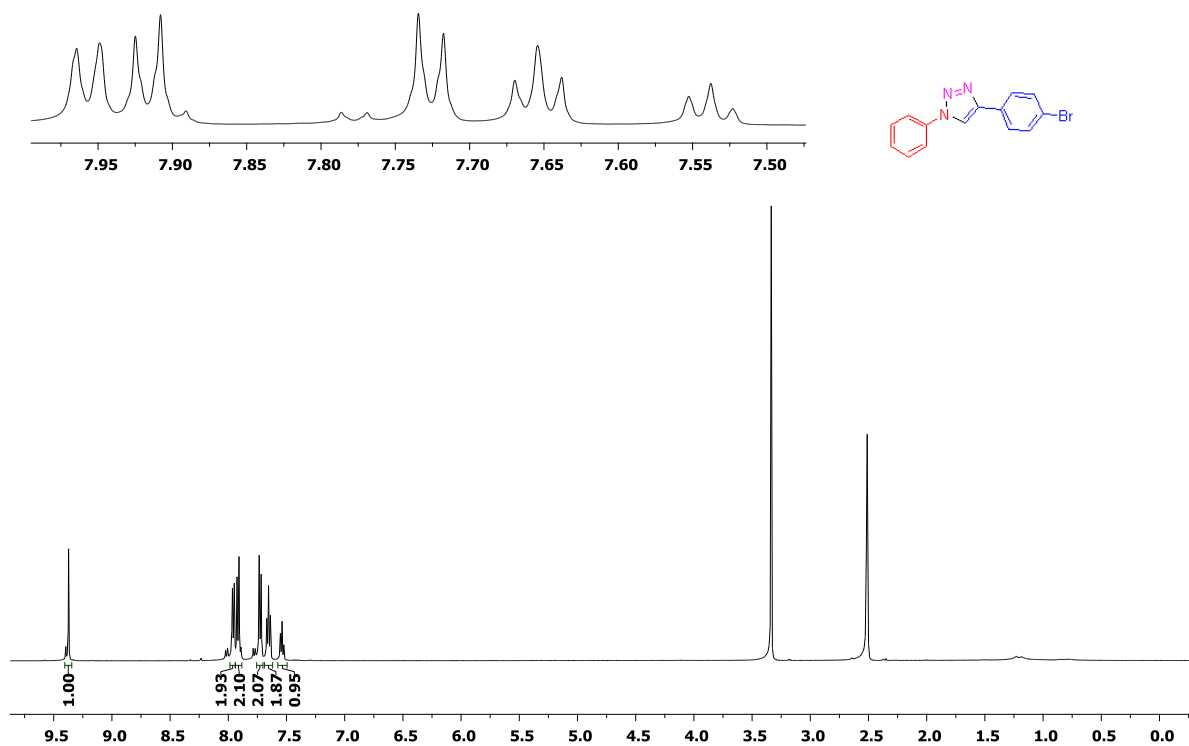

$^1\text{H}$  NMR (500 MHz, DMSO) spectrum of compound **4w**

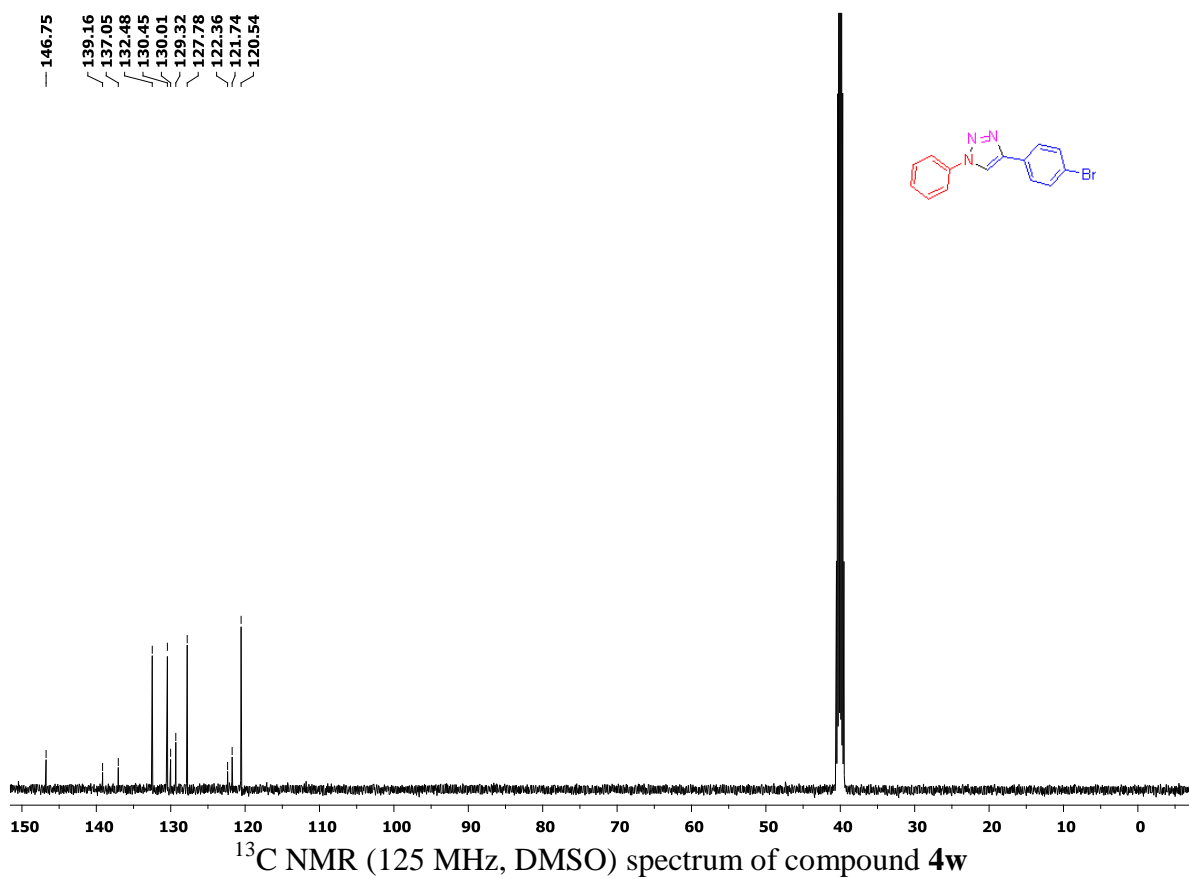

$^{13}\text{C}$  NMR (125 MHz, DMSO) spectrum of compound **4w**



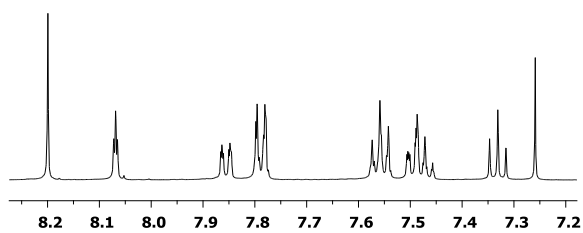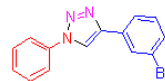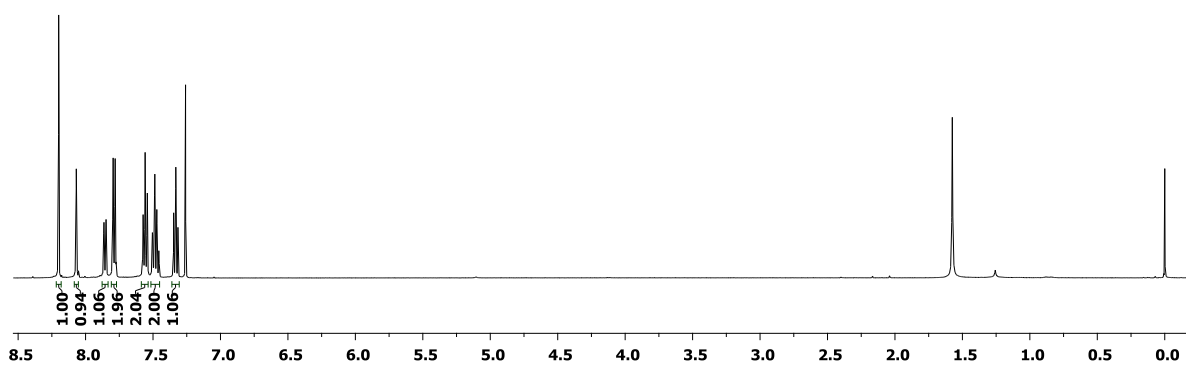

<sup>1</sup>H NMR (500 MHz, CDCl<sub>3</sub>) spectrum of compound 4x

146.99  
136.92  
132.27  
131.36  
130.51  
129.86  
128.99  
128.83  
124.42  
123.04  
120.58  
118.12

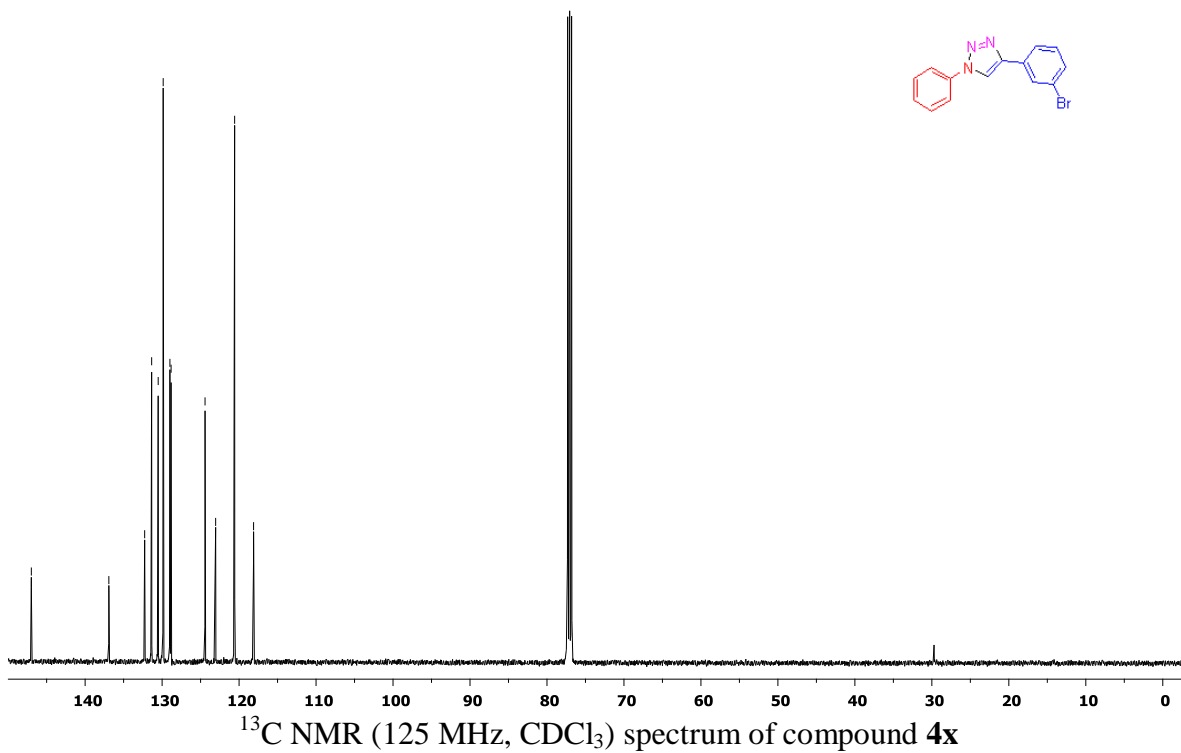

<sup>13</sup>C NMR (125 MHz, CDCl<sub>3</sub>) spectrum of compound 4x

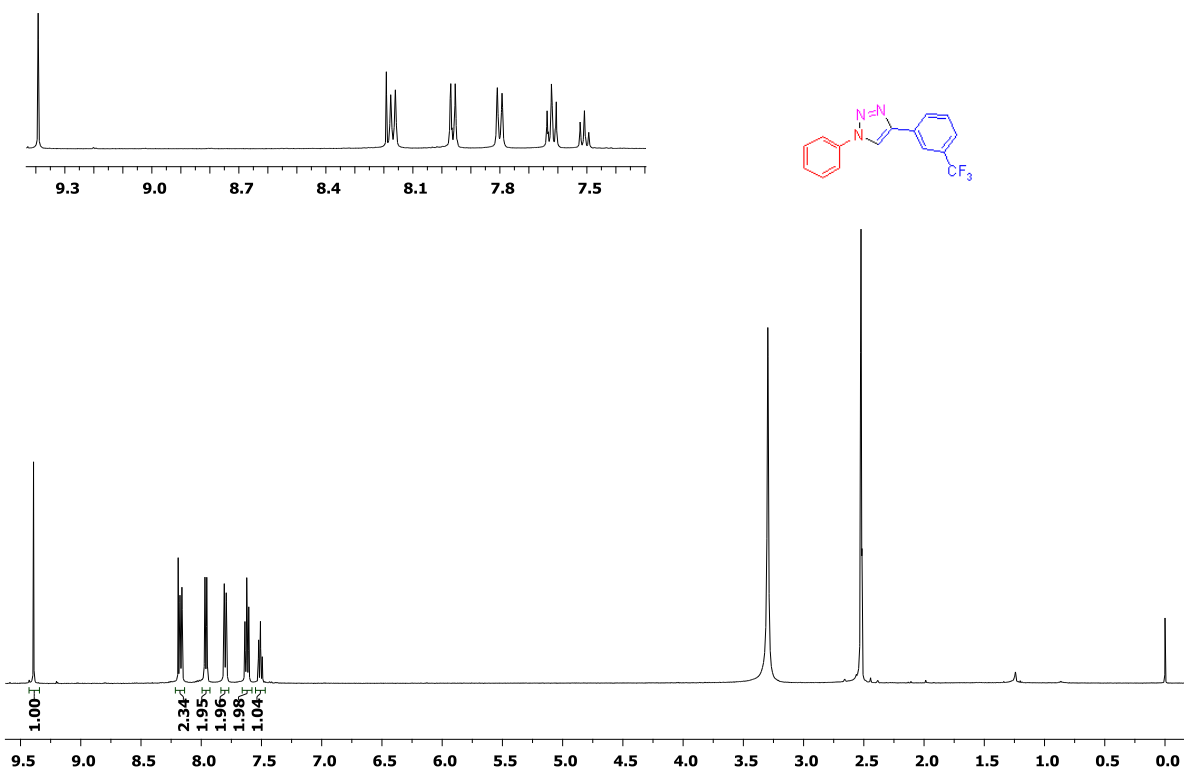

$^1\text{H NMR}$  (500 MHz, DMSO) spectrum of compound **4y**

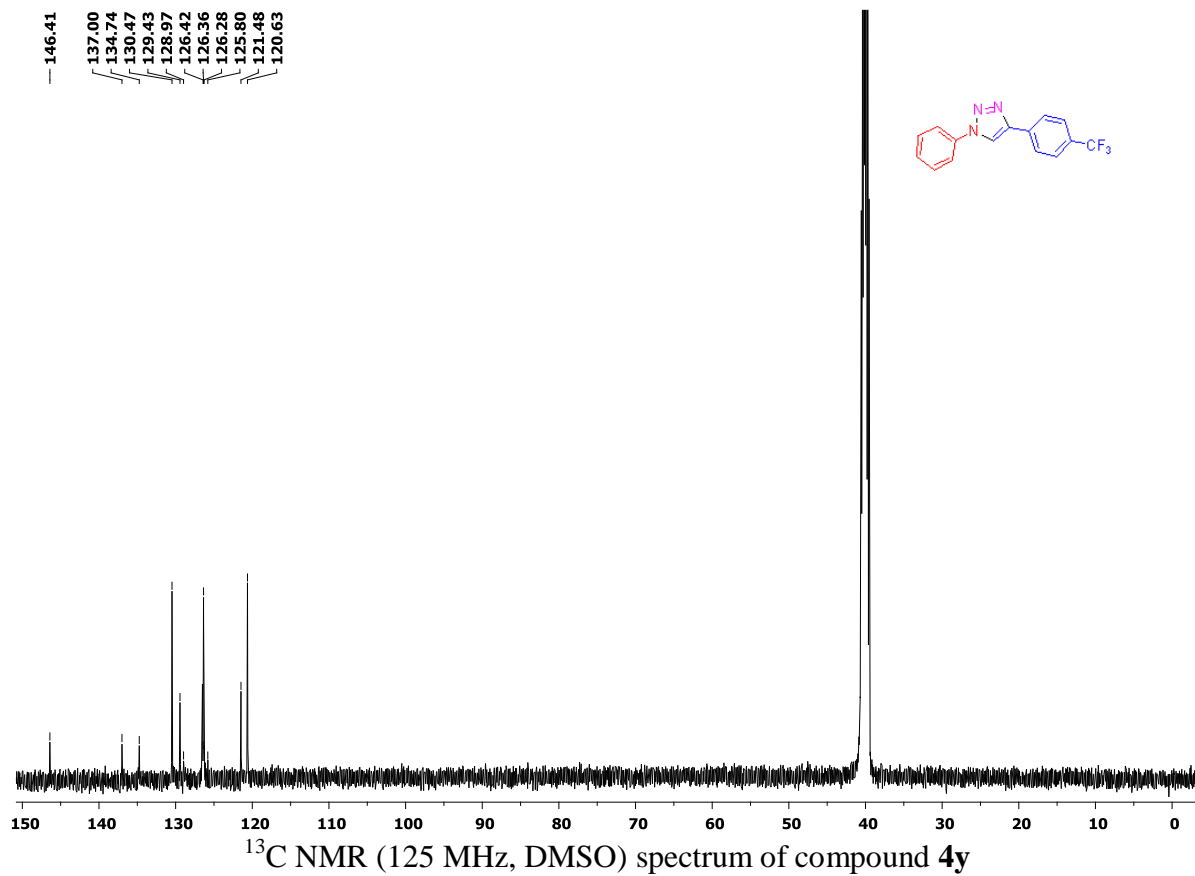

$^{13}\text{C NMR}$  (125 MHz, DMSO) spectrum of compound **4y**

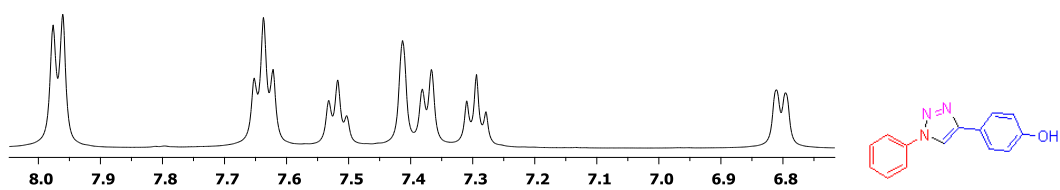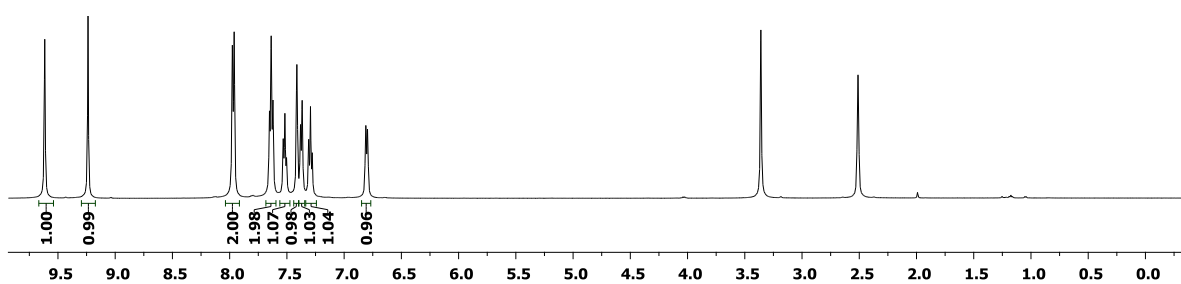

$^1\text{H}$  NMR (500 MHz, DMSO) spectrum of compound **4z**

— 158.32  
 — 147.92  
 — 137.16  
 — 131.94  
 — 130.49  
 — 130.38  
 — 129.14  
 — 120.48  
 — 119.99  
 — 116.67  
 — 115.77  
 — 112.63

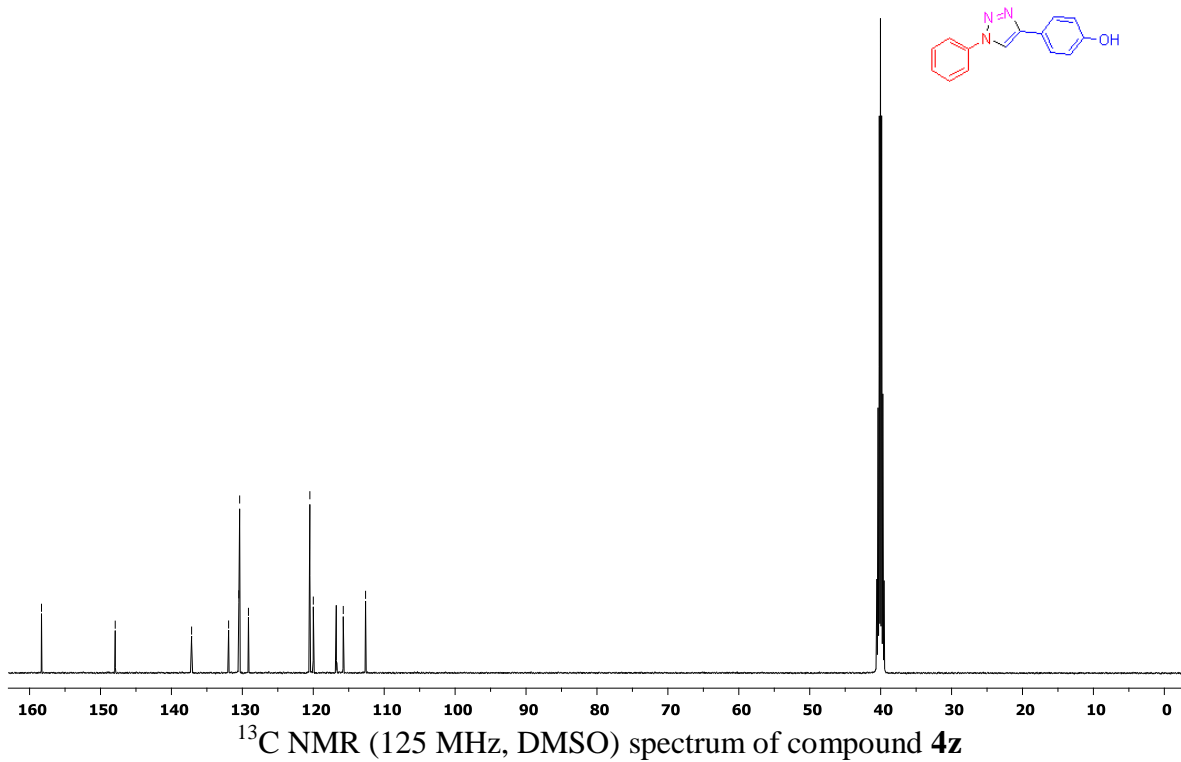

$^{13}\text{C}$  NMR (125 MHz, DMSO) spectrum of compound **4z**

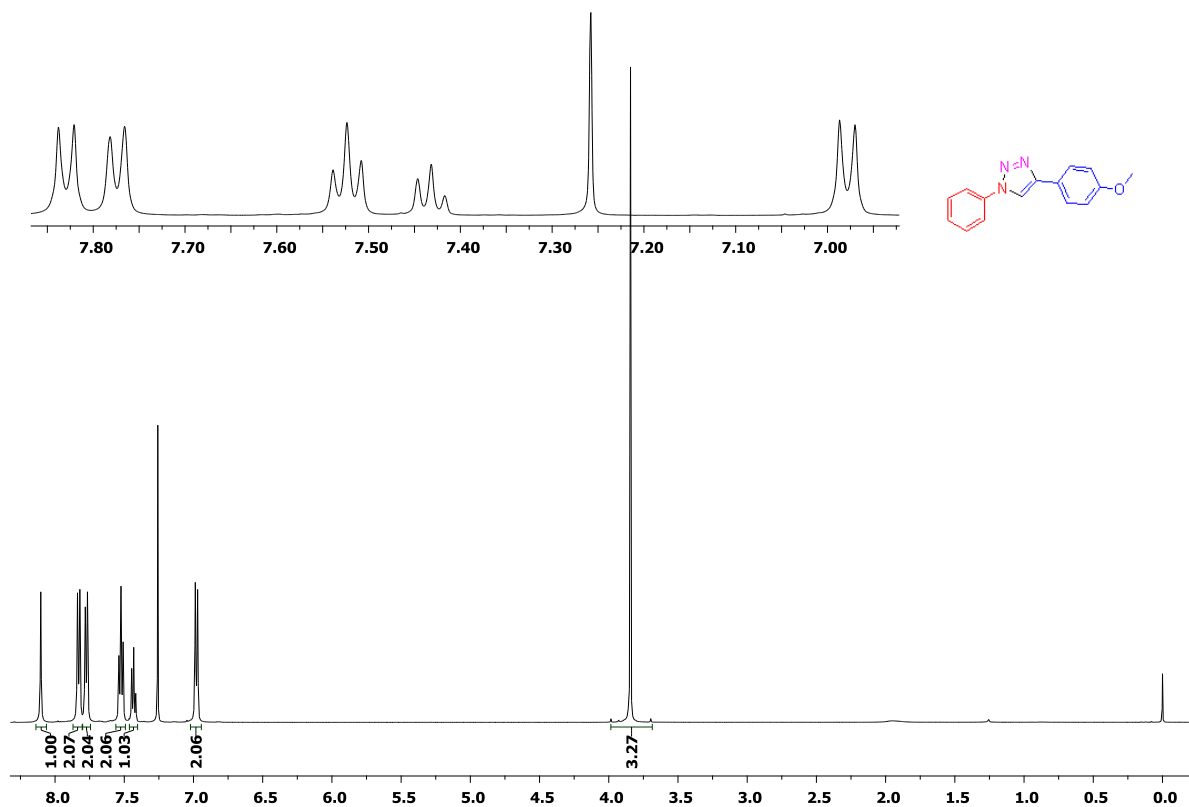

$^1\text{H}$  NMR (500 MHz,  $\text{CDCl}_3$ ) spectrum of compound **4aa**

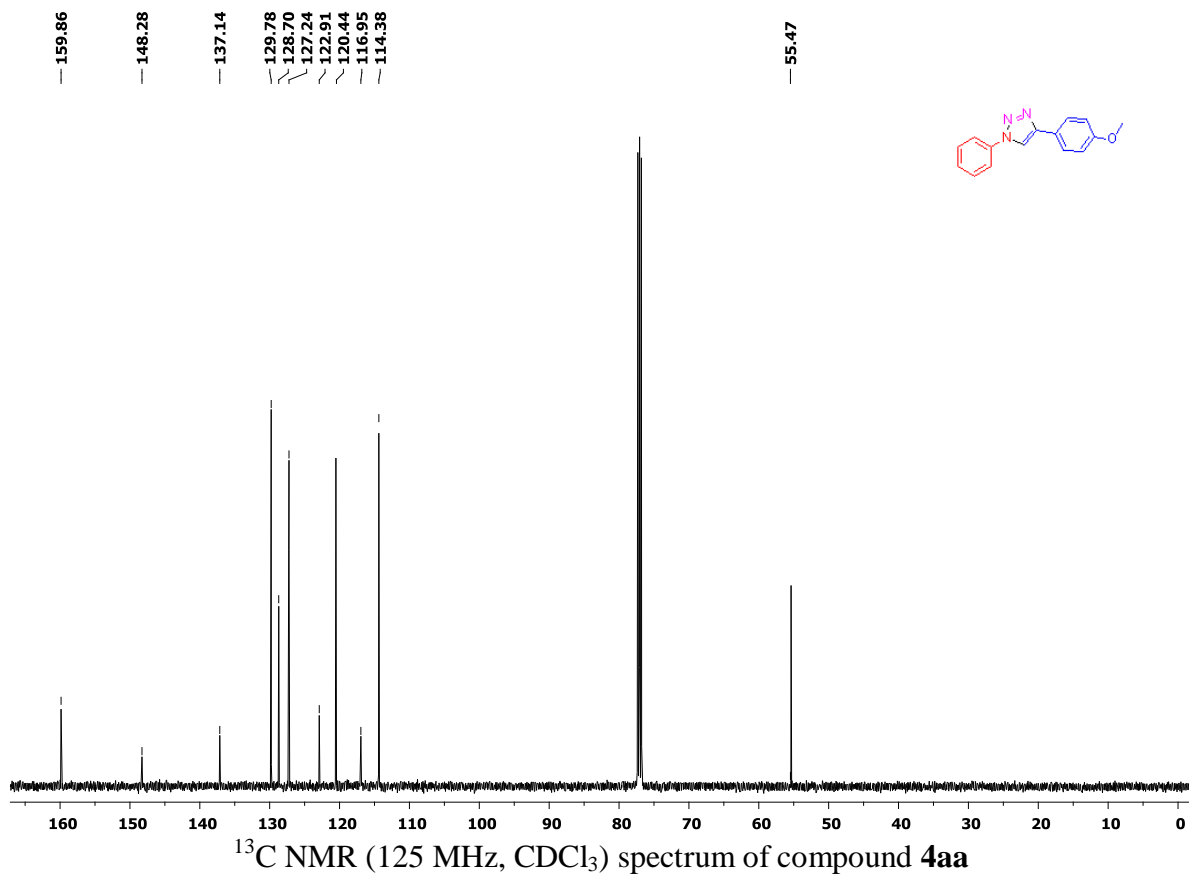

$^{13}\text{C}$  NMR (125 MHz,  $\text{CDCl}_3$ ) spectrum of compound **4aa**

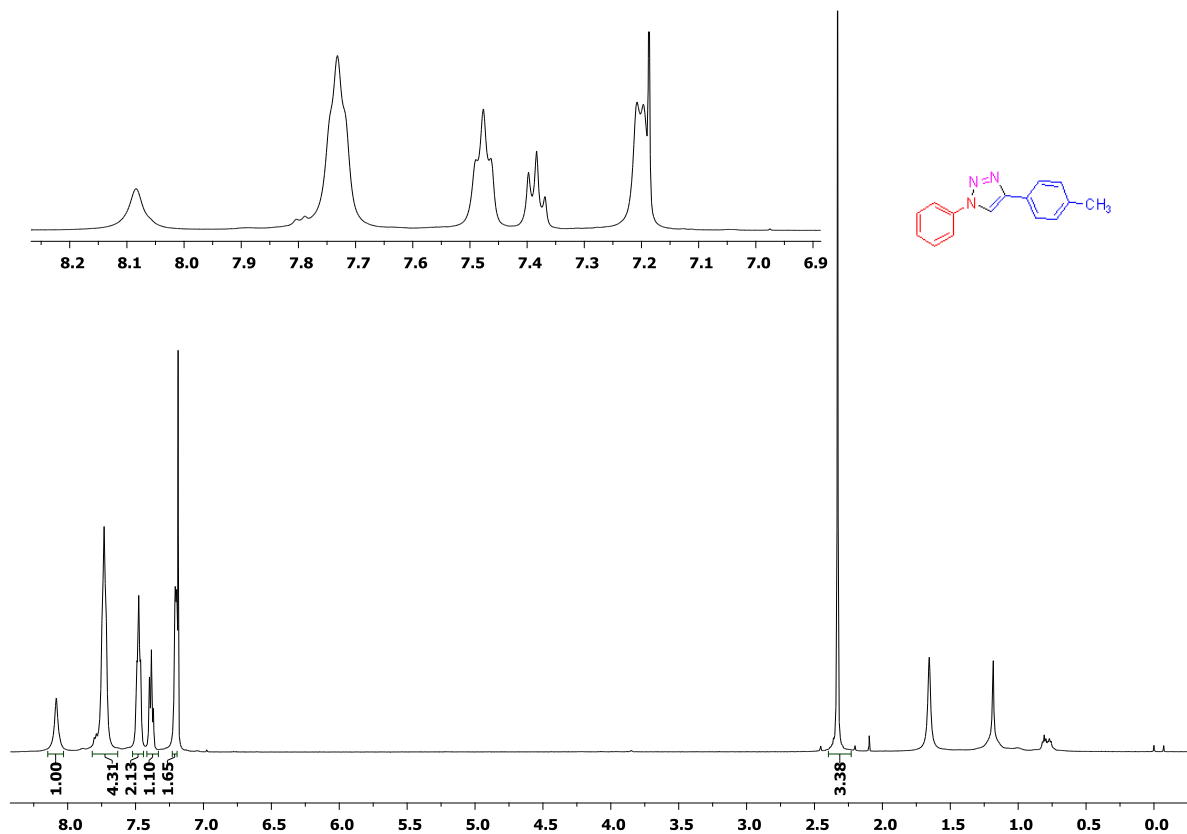

$^1\text{H}$  NMR (500 MHz,  $\text{CDCl}_3$ ) spectrum of compound **4ab**

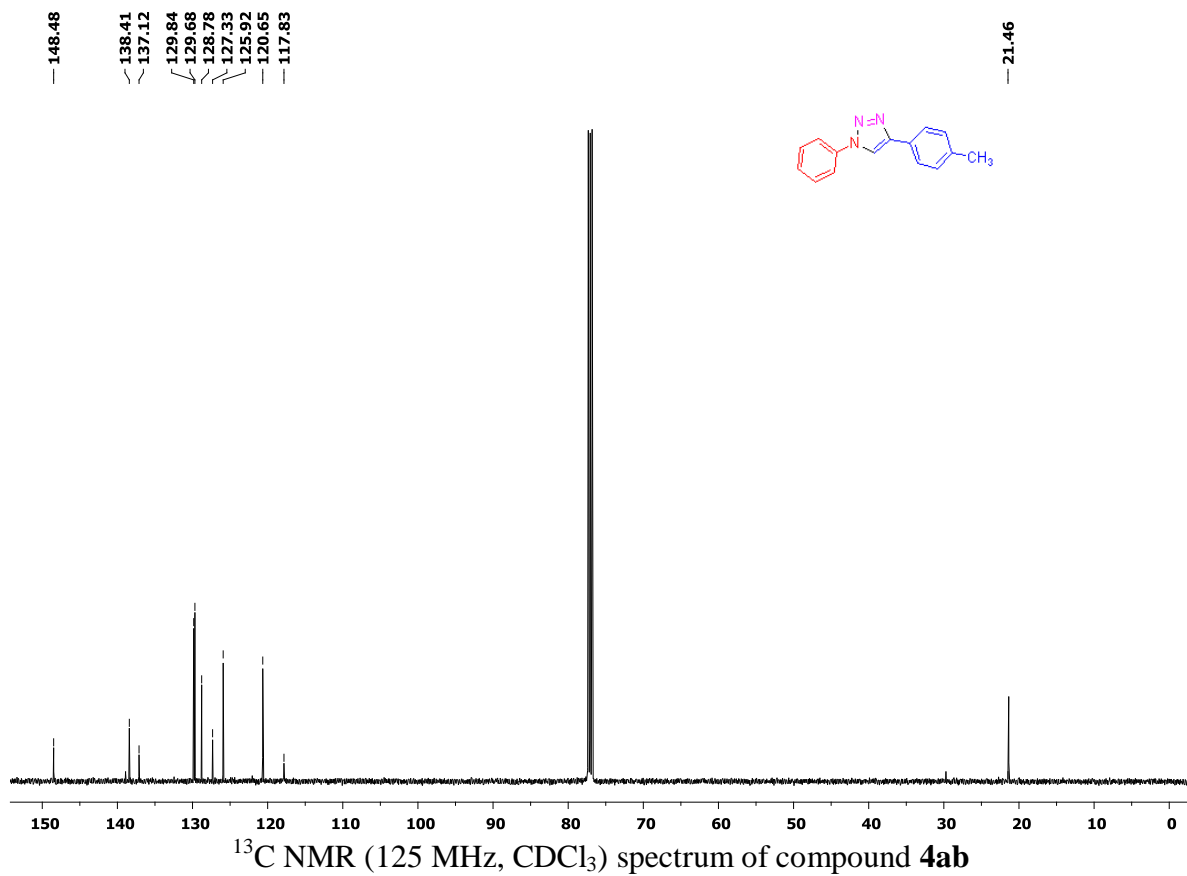

$^{13}\text{C}$  NMR (125 MHz,  $\text{CDCl}_3$ ) spectrum of compound **4ab**

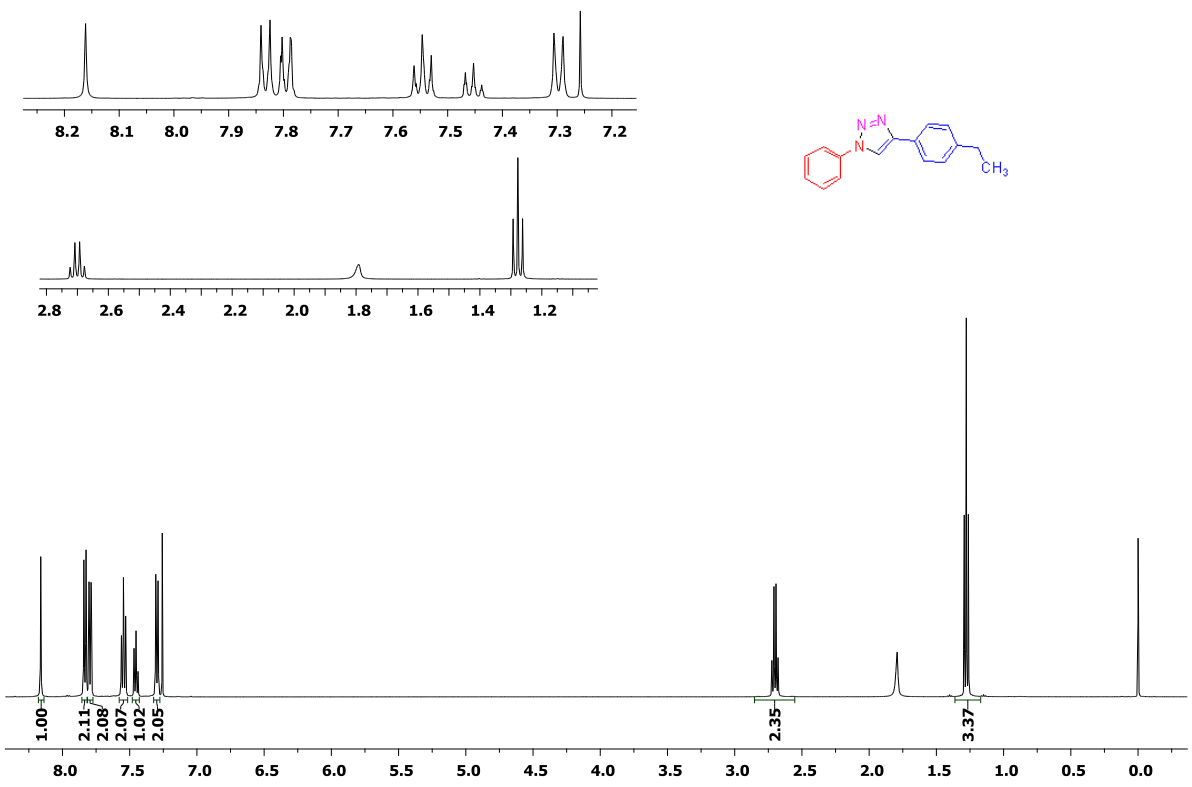

<sup>1</sup>H NMR (500 MHz, CDCl<sub>3</sub>) spectrum of compound **4ac**

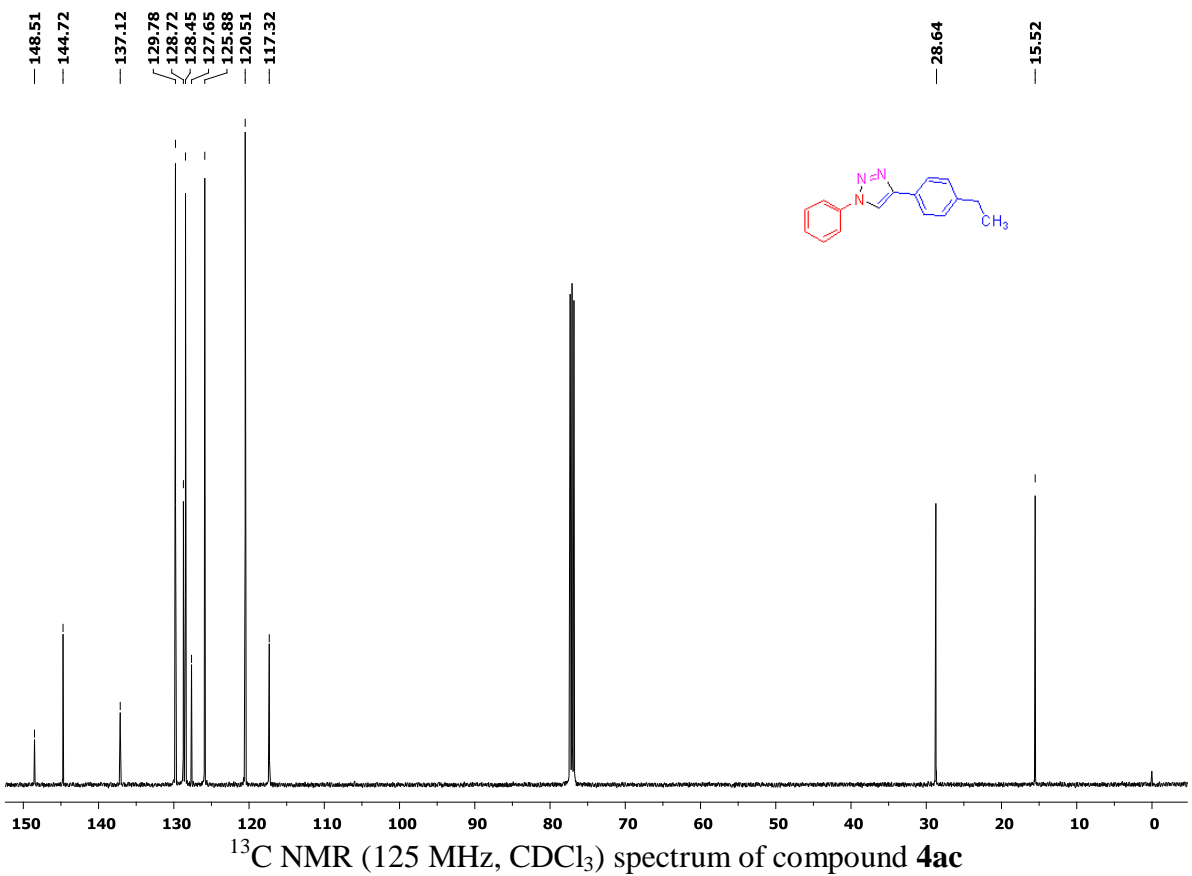

<sup>13</sup>C NMR (125 MHz, CDCl<sub>3</sub>) spectrum of compound **4ac**

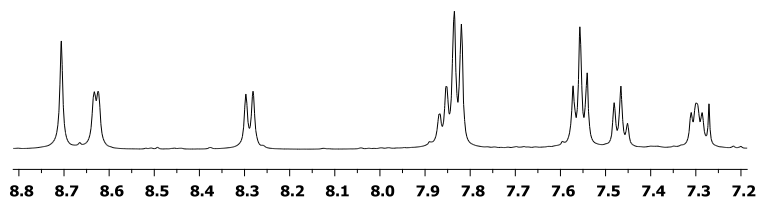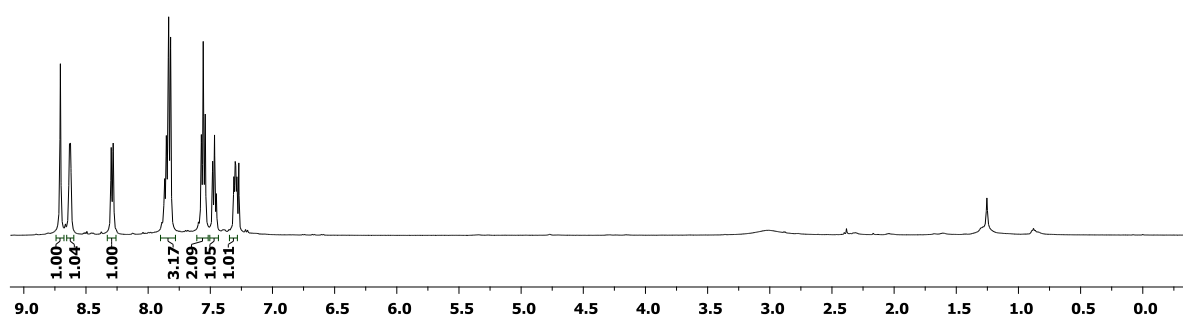

$^1\text{H}$  NMR (500 MHz,  $\text{CDCl}_3$ ) spectrum of compound **4ad**

$\delta$  149.63  
 $\delta$  148.94  
 $\delta$  148.30  
 $\delta$  137.58  
 $\delta$  136.97  
 $\delta$  129.86  
 $\delta$  128.95  
 $\delta$  123.21  
 $\delta$  120.70  
 $\delta$  120.49  
 $\delta$  120.36

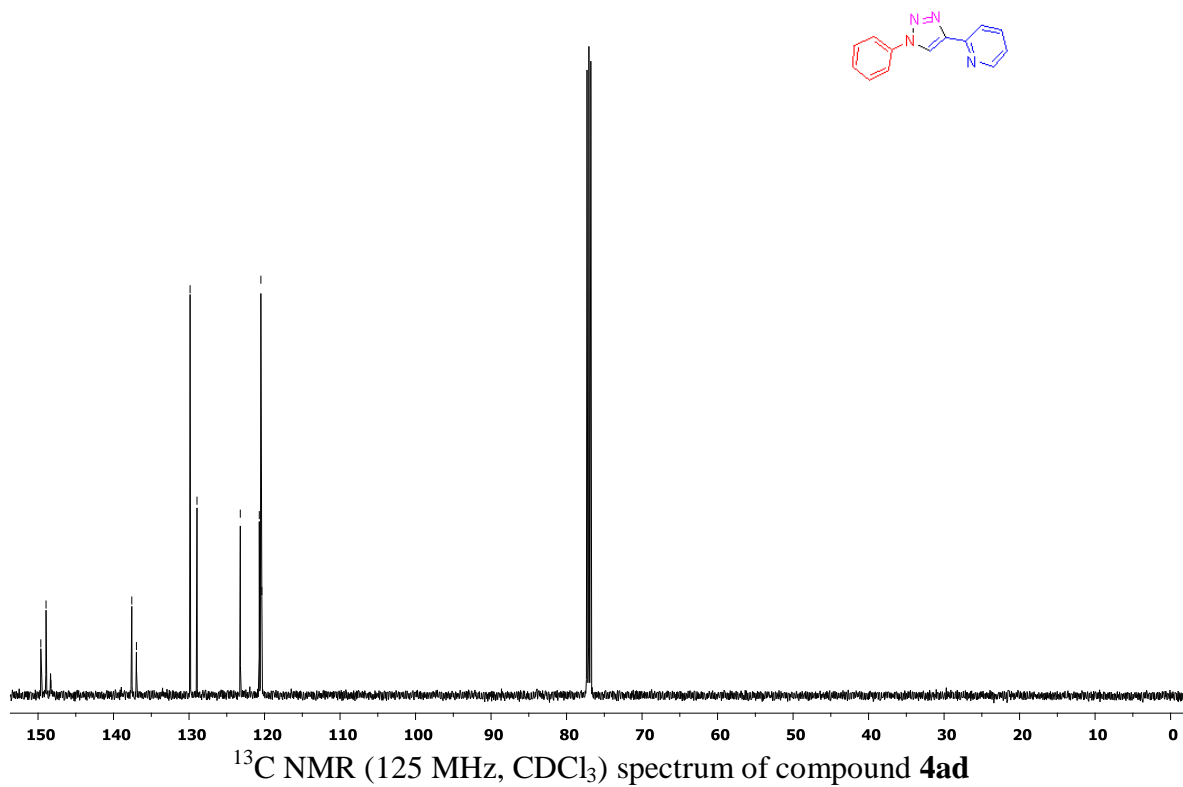

$^{13}\text{C}$  NMR (125 MHz,  $\text{CDCl}_3$ ) spectrum of compound **4ad**

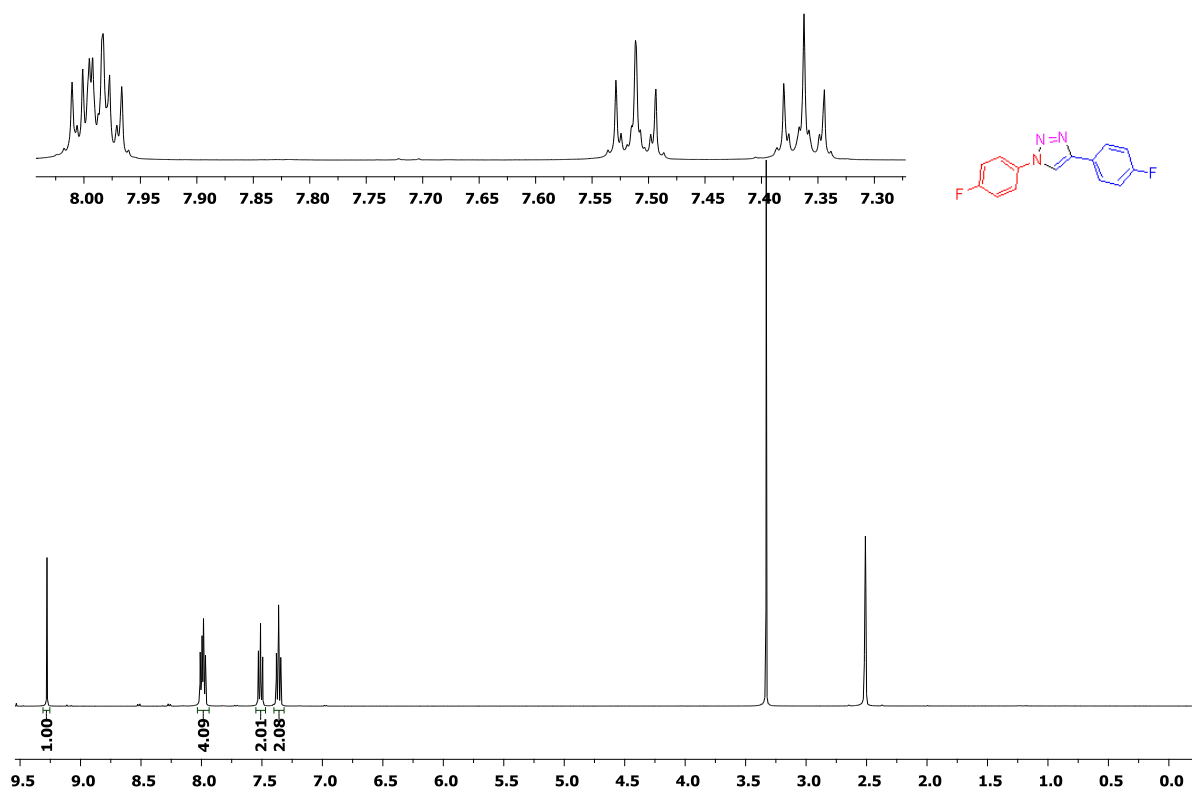

<sup>1</sup>H NMR (500 MHz, DMSO) spectrum of compound **4ae**

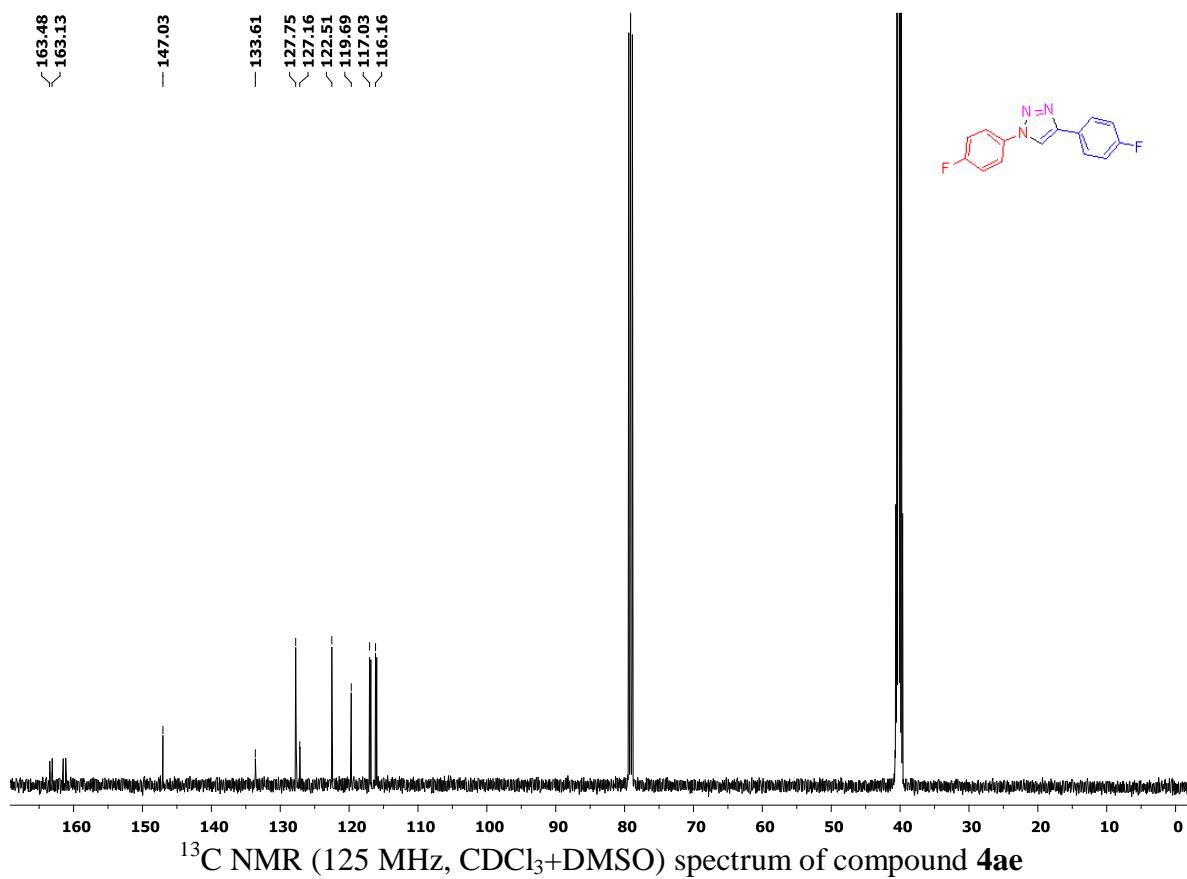

<sup>13</sup>C NMR (125 MHz, CDCl<sub>3</sub>+DMSO) spectrum of compound **4ae**



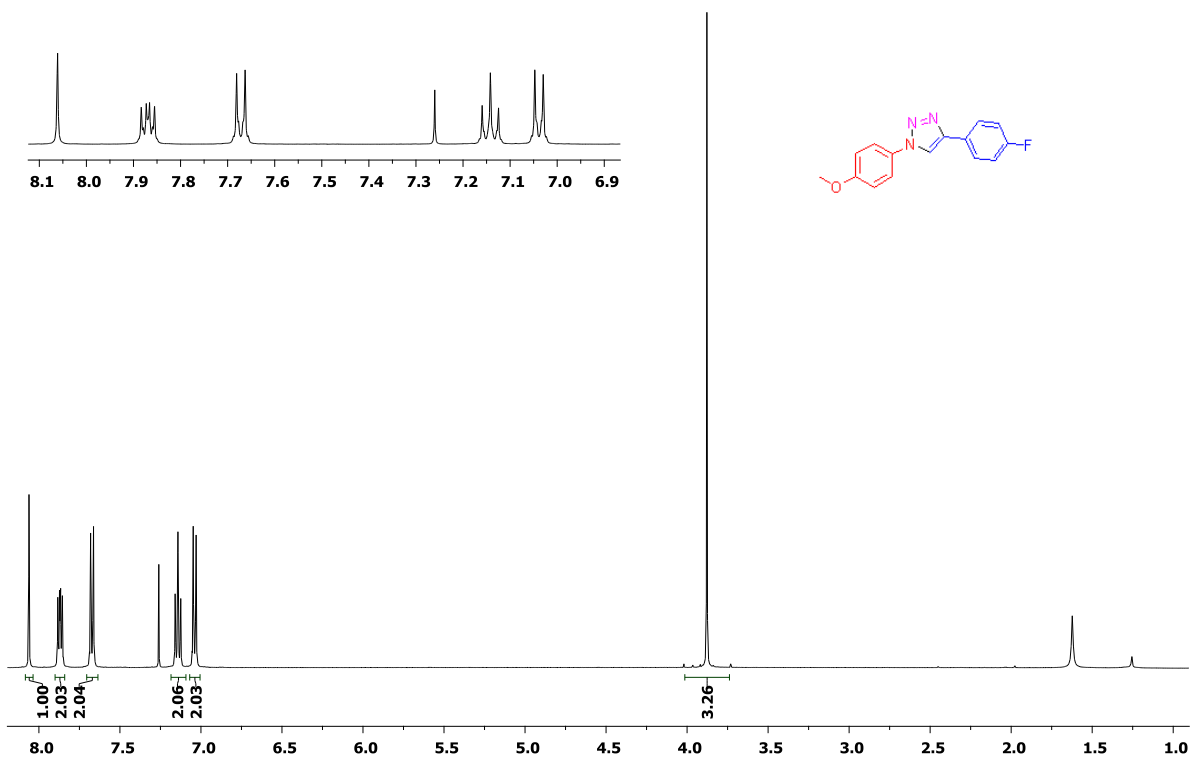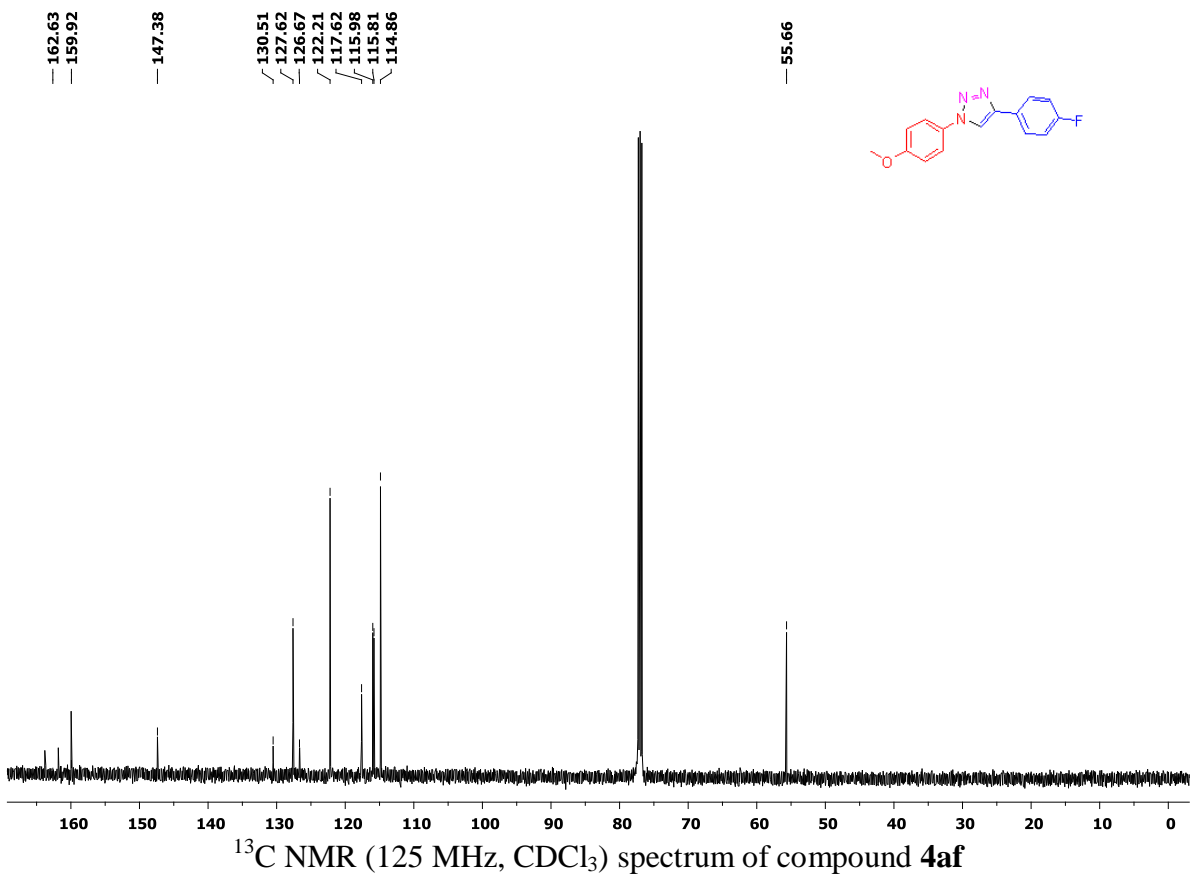

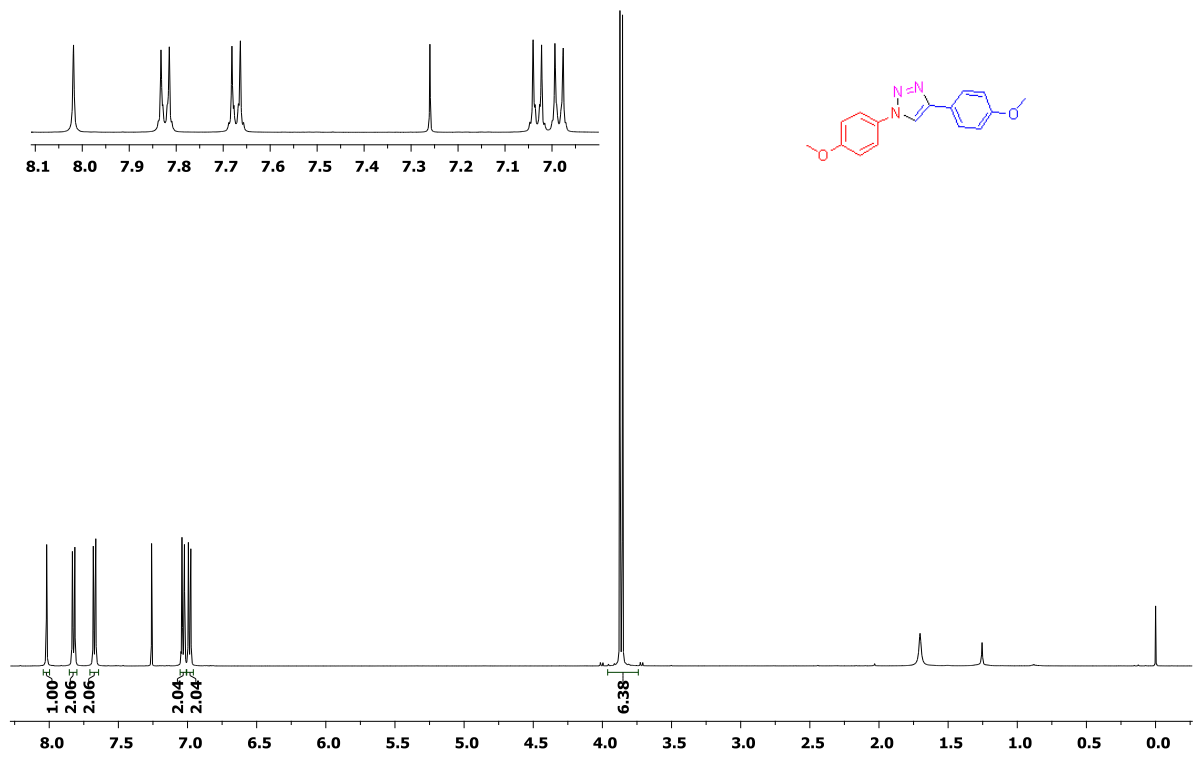

$^1\text{H NMR}$  (500 MHz,  $\text{CDCl}_3$ ) spectrum of compound **4ag**

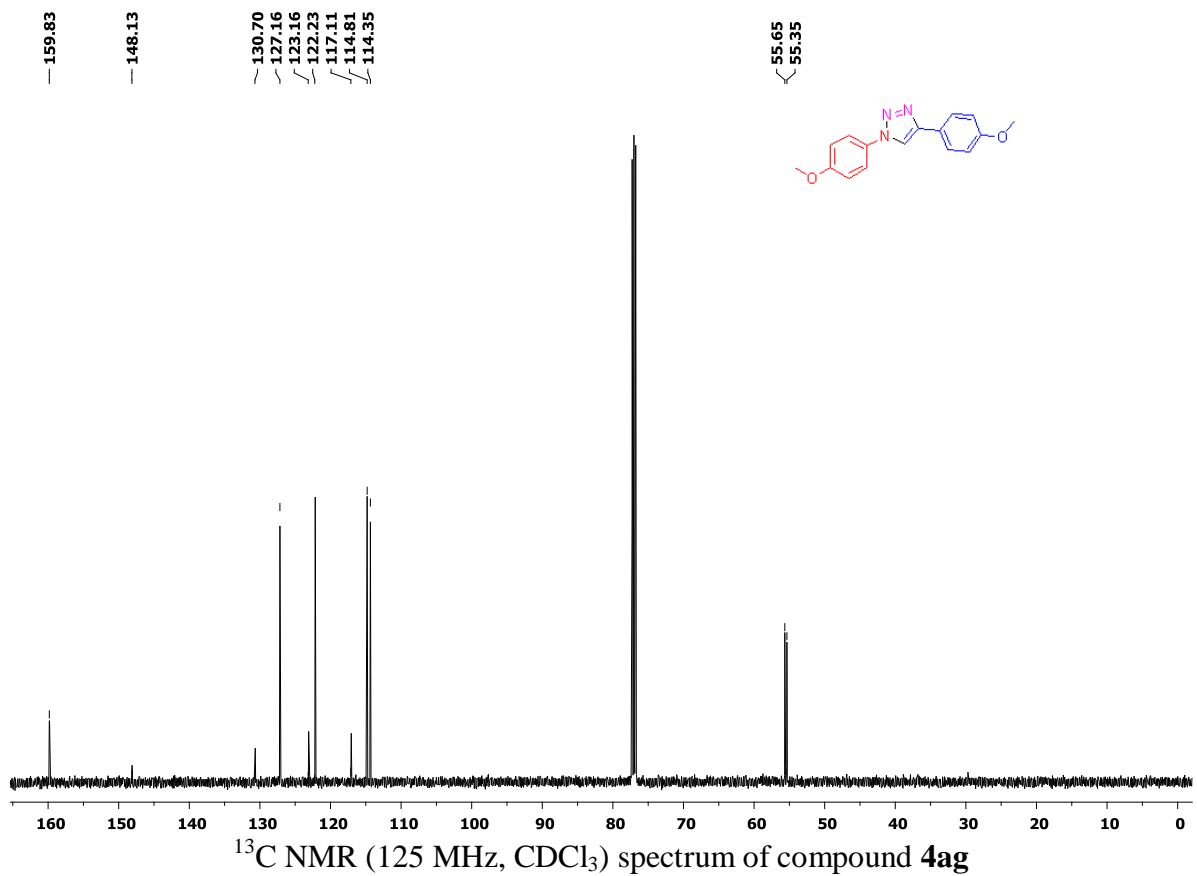

$^{13}\text{C NMR}$  (125 MHz,  $\text{CDCl}_3$ ) spectrum of compound **4ag**
